RESEARCH ARTICLE

# A Systematic Review of Childhood Maltreatment Assessments in Population-Representative Surveys Since 1990

Wendy Hovdestad<sup>1‡\*</sup>, Aimée Campeau<sup>2‡</sup>, Dawn Potter<sup>2‡</sup>, Lil Tonmyr<sup>1‡</sup>

**1** Public Health Agency of Canada, Government of Canada, Ottawa, Canada, **2** Ottawa, Canada

‡ Current address: Public Health Agency of Canada, Government of Canada, 785 Carling Ave., Ottawa, Ontario, K1A 0K9, Canada

\* [wendy.hovdestad@phac-aspc.gc.ca](mailto:wendy.hovdestad@phac-aspc.gc.ca)

## Abstract

### Background

Population-representative surveys that assess childhood maltreatment and health are a valuable resource to explore the implications of child maltreatment for population health. Systematic identification and evaluation of such surveys is needed to facilitate optimal use of their data and to inform future research.

### Objectives

To inform researchers of the existence and nature of population-representative surveys relevant to understanding links between childhood maltreatment and health; to evaluate the assessment of childhood maltreatment in this body of work.

### Methods

We included surveys that: 1) were representative of the non-institutionalized population of any size nation or of any geopolitical region  $\geq 10$  million people; 2) included a broad age range ( $\geq 40$  years); 3) measured health; 4) assessed childhood maltreatment retrospectively; and 5) were conducted since 1990. We used Internet and database searching (including CINAHL, Embase, ERIC, Global Health, MEDLINE, PsycINFO, Scopus, Social Policy and Practice: January 1990 to March 2014), expert consultation, and other means to identify surveys and associated documentation. Translations of non-English survey content were verified by fluent readers of survey languages. We developed checklists to abstract and evaluate childhood maltreatment content.

### Results

Fifty-four surveys from 39 countries met inclusion criteria. Sample sizes ranged from 1,287-51,945 and response rates from 15%-96%. Thirteen surveys assessed neglect, 15 emotional abuse; 18 exposure to family violence; 26 physical abuse; 48 sexual abuse. Fourteen surveys assessed more than three types; six of these were conducted since 2010. In nine

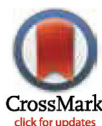

## OPEN ACCESS

**Citation:** Hovdestad W, Campeau A, Potter D, Tonmyr L (2015) A Systematic Review of Childhood Maltreatment Assessments in Population-Representative Surveys Since 1990. PLoS ONE 10(5): e0123366. doi:10.1371/journal.pone.0123366

**Academic Editor:** Paula Braitstein, Indiana University and Moi University, UNITED STATES

**Received:** July 14, 2014

**Accepted:** February 22, 2015

**Published:** May 18, 2015

**Copyright:** © 2015 Hovdestad et al. This is an open access article distributed under the terms of the [Creative Commons Attribution License](https://creativecommons.org/licenses/by/4.0/), which permits unrestricted use, distribution, and reproduction in any medium, provided the original author and source are credited.

**Data Availability Statement:** All relevant data are within the paper and its Supporting Information files.

**Funding:** The authors have no support or funding to report.

**Competing Interests:** The authors have declared that no competing interests exist.

surveys childhood maltreatment assessments were detailed (+10 items for at least one type of maltreatment). Seven surveys' assessments had known reliability and/or validity.

## Conclusions and Implications

Data from 54 surveys can be used to explore the population health relevance of child maltreatment. Assessment of childhood maltreatment is not comprehensive but there is evidence of recent improvement.

## Introduction

Child maltreatment has been defined by the Public Health Agency of Canada as neglect, exposure to intimate partner violence, emotional maltreatment, physical and sexual abuse [1]. The American Centers for Disease Control similarly defines child maltreatment as abuse or neglect of someone under age 18 years by any person in a custodial role [2]. Child maltreatment is recognized as a serious problem around the world. Cumulative childhood prevalence estimates range from 1% (intrusive sexual abuse of boys) to 35% (assaults including serious threats), depending on the maltreatment type, respondents' gender, the geographical region, and other factors [3]. These may be underestimates, given that some interviewees with previously documented maltreatment provide false negatives [4–7]. Adults with histories of childhood maltreatment are more likely than those without such histories to experience a variety of negative health outcomes, and these associations persist when effects due to variables such as income are statistically controlled [8–10]. A wide variety of population-representative surveys are relevant to health, whether they focus on health behaviours (e.g., alcohol use, sexual behaviour), on specific health outcomes, or on social issues with health implications (e.g., criminal victimization). If such surveys include childhood maltreatment measures, they can illuminate the long-term population health implications of the maltreatment of children.

Although causality cannot be inferred from cross-sectional surveys, it has been recently argued that retrospective population-representative community based surveys have an important role to play in understanding child maltreatment [11]. Such surveys also allow the study of health-relevant outcomes that may be undocumented (e.g., re-victimization, untreated illness), in administrative medical and social services databases. In addition, they allow the exploration of research questions that are potentially difficult to address with child samples due to ethical and reporting requirements [12,13]. Nonetheless, population-representative surveys are usually limited to the non-institutionalized population with a fixed household address and may be limited to fluent speakers of the dominant regional language. These exclusions may cause underestimation of the strength of the associations between adversity-related predictor and health outcome variables [14,15]. Although concerns have been raised about the use of retrospective reports of childhood maltreatment [5], arguments by Kendell-Tackett and Becker-Blease [16] and analyses of data from New Zealand, American, British, and German samples are reassuring [9,17–19]. Recent work has found, for example, that psychological adjustment is related to adverse childhood experiences in the same way whether adversity is assessed prospectively or retrospectively [19].

Some issues with using population representative surveys as a means to understand child maltreatment and population health are specific to the surveys' childhood maltreatment assessments. For example, the definition of a type of maltreatment may be left to the respondents (e.g., "Were you ever physically abused?") rather than being defined by specific behaviours. Items to assess maltreatment may be of unknown reliability and validity. Some types of child

maltreatment (e.g., neglect, emotional abuse) are studied less often than others [3] and surveys' inclusion of multiple types of childhood maltreatment is also an important issue.

Spurred in part by earlier reports of issues encountered in efforts to include childhood maltreatment and other highly personal questions in health surveys [20–22] and following from earlier reviews [23,24], this is a systematic review and evaluation of the childhood maltreatment assessments in population-representative surveys with any health content, worldwide, since 1990. The first objective is to provide a resource that informs health researchers of the existence and nature of surveys that assessed childhood maltreatment in order to facilitate secondary data analyses. The second objective is to describe and evaluate childhood maltreatment assessments that have been used on earlier population-representative surveys. This paper is intended as a resource to facilitate planning of future surveys in Canada and worldwide. To the best of our knowledge no similar resource exists.

## Methods

This systematic review was done according to PRISMA guidelines (see [S1 PRISMA Checklist](#)).

### Search Strategy

[Fig 1](#) shows our means of including surveys. We began by searching citation databases to identify peer-reviewed articles that used data from relevant surveys (January 1990-March 2014). Cinahl, Embase, ERIC, Global Health, MEDLINE, PsycINFO, Scopus, Social Policy and Practice were searched with assistance from a librarian.

A sample search string was: ((TITLE-ABS-KEY-AUTH((survey\* W/3 health) OR (representati\* W/3 survey\*) OR (household\* W/3 survey\*) OR (general\* W/3 survey\*) OR (morbid\* W/3 survey\*))) AND TITLE-ABS-KEY((child\* AND victimization) OR (child\* W/3 abuse\*) OR (child\* W/3 neglect\*) OR (child\* W/5 assault\*) OR (child\* W/2 violence) OR (child W/3 maltreat\*) OR (child\* AND punishment\*) OR (punitiv\* W/3 experienc\*) OR (child\* AND witness\* AND violen\*))) OR (((TITLE-ABS-KEY-AUTH((survey\* W/3 health) OR (representati\* W/3 survey\*) OR (household\* W/3 survey\*) OR (general\* W/3 survey\*) OR (morbid\* W/3 survey\*))) AND (TITLE-ABS-KEY(national\* AND child\*)) AND (TITLE-ABS-KEY(victimizat\* OR victimisat\* OR (child\* W/3 abus\*) OR (child\* W/3 maltreat\*) OR (child\* W/3 neglect\*) OR (domest\* W/3 violenc\*) OR (domest\* W/3 violent\*) OR (famil\* W/3 violen\*) OR (partner\* W/3 violen\*) OR (sex\* W/3 assault\*) OR (sex\* W/3 abus\*) OR (sex\* W/3 maltreat\*) OR (psycholog\* W/3 assault\*) OR (psycholog\* W/3 abus\*) OR (psycholog\* W/3 maltreat\*) OR (emotion\* W/3 assault\*) OR (emotion\* W/3 abus\*) OR (emotion\* W/3 maltreat\*) OR ((witness\* OR expos\* OR exposed\*) AND violen\*) OR "physical punishment" OR punitive OR "physical abuse")))).

In the initial search, two teams of two reviewers independently screened titles and abstracts. After this training phase, titles and abstracts were screened by one reviewer. Inclusion criteria for articles identified in this way were as stated below. Five additional steps were taken to identify relevant surveys not described in the 99 included articles. Excluded articles were re-checked as articles pertaining to subpopulations did, at times, utilize representative surveys. Internet searches were performed using titles of all included surveys to ensure additional cycles that met criteria were not overlooked. Internet searches were conducted using an abbreviated list of search strings to identify potential new surveys. A list of included surveys was shared with two electronic discussion forums populated by child maltreatment experts. Communication with experts led to the identification of additional relevant surveys. Finally, we searched reference lists from included and excluded articles, along with references from research bibliographies on survey websites.

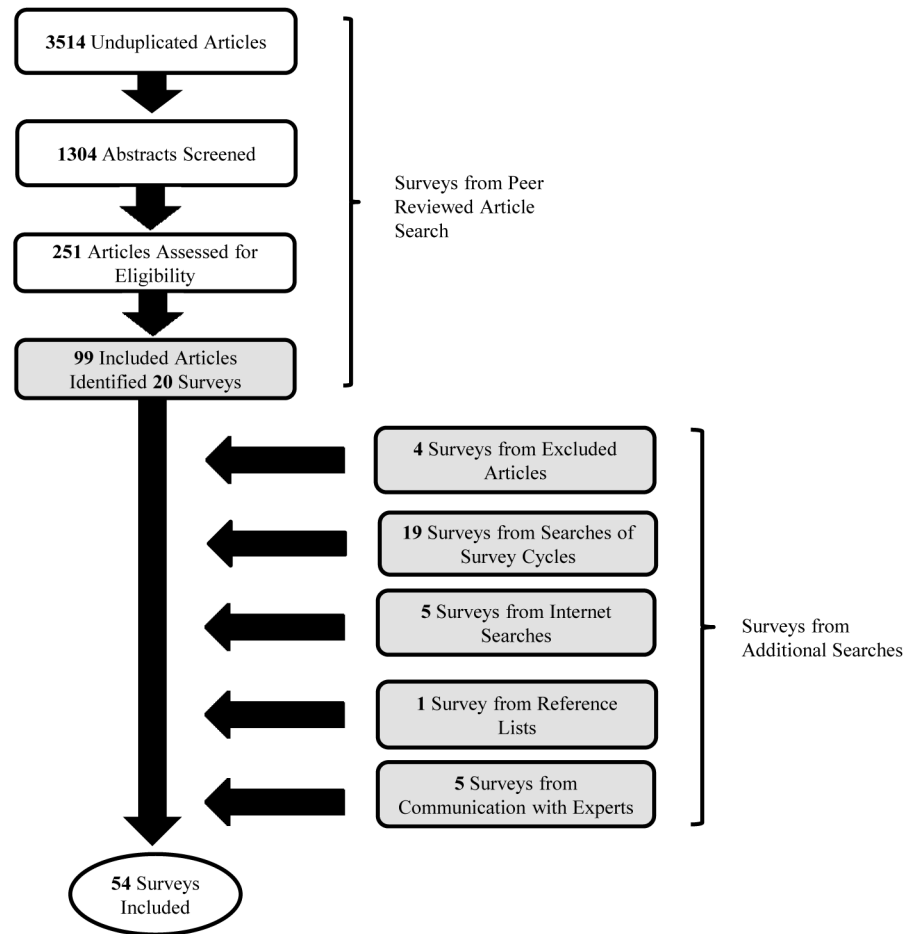

**Fig 1. Survey Identification and Inclusion Process.** Unshaded boxes represent database searches of peer-reviewed articles. Shaded boxes represent sources of included surveys.

doi:10.1371/journal.pone.0123366.g001

Additional materials pertaining to reliability and validity of surveys’ childhood maltreatment assessments were obtained by other Internet searching (using key words from each survey title in combination with “reliability” and “validity”).

### Survey Selection

Population representative surveys including assessment of both childhood maltreatment and health were eligible for inclusion. We defined population representative surveys as those which were described that way by users of the data (i.e., authors of articles), which had been sampled and weighted in order to accurately reflect the members of the entire population.

We defined childhood maltreatment as respondents’ experiences before age 18 years involving family or caregiver-related emotional or physical neglect, emotional or physical abuse. The initial review protocol specified assessments specific to childhood exposure to intimate partner violence but was adapted to include violence within the family in which victims and/or perpetrators were unspecified (See [S1 Protocol](#)). We included any sexual abuse before age 18, not exclusively acts committed by a caregiver. Our choices here with regard to how to define childhood maltreatment reflect our child welfare and public health informed understandings that child sexual abuse (where a child is a person under age 18 years) is different from other

forms of child maltreatment. Sexual assault of children, especially girls, is common, and has important health impacts whether the perpetrators are intra- or extra-familial. Some forms of child maltreatment (e.g., neglect, emotional abuse) can only occur within ongoing relationships. Sexual abuse is different, in that strangers and acquaintances can and do victimize children this way.

No minimum quality criteria were applied to childhood maltreatment assessments; items posed to survey respondents only needed to correspond to any one of the five maltreatment subtypes [1].

Health was defined broadly, including mental and physical health, self-esteem, health care utilization, alcohol or substance use, injury, and re-victimization (but not violence perpetration nor experience of criminal sanctions). Fourteen non-English surveys were included because the survey was described in an English article (see search strategy) or because communication with survey administrators and/or article authors was possible. Surveys were included if they were representative of the household population of a sovereign nation or if they were representative of a distinct geopolitical region of at least 10 million people. Due to our broad public health focus and the need to limit the scope of the review, surveys were excluded if respondent ages spanned less than 40 years (e.g., adolescents and young adults only) or if respondents were representative only of a subpopulation (e.g., women).

**Data Collection Process.** The complete instruments were obtained for review for all but seven of the included surveys. For the seven surveys, experts confirmed that questions pertaining to childhood maltreatment were repeated verbatim from earlier cycles for which the complete instruments had been obtained, or provided excerpts containing the childhood maltreatment content. Survey methods, geographical coverage information, maltreatment type, and characteristics of the maltreatment assessment measures (e.g., reliability, validity) were extracted from research and methods articles, survey websites (where available), survey instruments, and from personal communications with survey administrators and data users. Survey instruments were searched for additional child maltreatment content not described in associated articles. Five checklists were developed and adapted as necessary to reflect concepts used on surveys to assess childhood maltreatment. The key shared domains of our five checklists were item count, self-defined maltreatment, behaviours constituting maltreatment, and indicators of severity. The checklists correspond exactly to the column headings, used below. Our use of checklists to describe and evaluate surveys' childhood maltreatment assessment is in keeping with earlier recommendations that the best tools are simple checklists, specific to the content, with a small number of key domains [25]. Better quality of childhood maltreatment assessment was indicated by use of multiple rather than single items, behaviourally-specific rather than self-defined items, use of items with known reliability and validity, and assessment of multiple rather than single types of childhood maltreatment. Survey instruments and associated documentation were reviewed independently by at least two authors to ensure that all relevant content was accurately extracted. At all stages of data extraction, disagreements were rare and were resolved by discussion to consensus.

## Results

[Table 1](#) summarizes the 54 included surveys, conducted in 39 countries. The table presents the surveys in chronological order, with multi-cycle surveys grouped together. The majority of surveys were conducted in high income countries (e.g., the United States, Canada, several European countries), followed by middle to low-middle income countries (e.g., Brazil, China), and a low income country (i.e., Uganda). The Ugandan survey was conducted as part of the Gender, Alcohol and Culture International Study (GENACIS). More surveys were conducted in the

**Table 1. Fifty-Four Representative Population Health, Social and Victimization Surveys since 1990 Included in this Review, in Chronological Order.**

| Survey                                                                  | Country                    | Year(s) conducted | Mode of Administration | N            | Response Rate <sup>a</sup> | Age                 | Childhood maltreatment type |    |     |    |    |
|-------------------------------------------------------------------------|----------------------------|-------------------|------------------------|--------------|----------------------------|---------------------|-----------------------------|----|-----|----|----|
|                                                                         |                            |                   |                        |              |                            |                     | NG                          | EA | EFV | PA | SA |
| The Ontario Health Survey Mental Health Supplement (OHSUP) [26,27]      | Canada                     | 1990–91           | PAPI                   | 9 953        | 67%                        | 15+                 | •                           | –  | –   | •  |    |
| National Comorbidity Survey (NCS) [28,29]                               | United States              | 1990–92           | PAPI                   | 8 098        | 82%                        | 15–54               | •                           | •  | •   | •  |    |
| NCS-2 [28,30]                                                           | United States              | 2001–03           | CATI                   | 5 001        | 88%                        | 26–67               | •                           | –  | –   | –  |    |
| National Health and Social Life Survey (NHLSL) [21,31]                  | United States              | 1992              | PI, PAPQ               | 3 159        | 79%                        | 18–59               | –                           | –  | –   | •  |    |
| General Social Survey (GSS) [32–37]                                     | Canada                     | 1999              | CATI <sup>b</sup>      | 25 876       | 81%                        | 15+                 | –                           | –  | –   | •  |    |
|                                                                         |                            | 2009              | CATI                   | 19 422       | 62%                        | 15+                 | –                           | –  | –   | •  |    |
|                                                                         |                            | 2014              | CATI, CATI             | <sup>c</sup> | –                          | 15+                 | –                           | –  | –   | •  |    |
| National Survey of Midlife Development (MIDUS) [38,39]                  | United States              | 1995–96           | CATI, PAPQ             | 3 034        | 61%                        | 25–74               | •                           | •  | •   | –  |    |
| MIDUS-2 [40,41]                                                         | United States              | 2004–06           | CATI, PAPQ             | 1 805        | 57%                        | 32–85               | –                           | –  | –   | •  |    |
| National Violence Against Women Survey (NVAWS) [42,43]                  | United States              | 1995–96           | CATI                   | 16 005       | 70%                        | 18+                 | –                           | –  | –   | •  |    |
| National Alcohol Survey (NAS) [44–51]                                   | United States              | 1995              | PI                     | 4 803        | 77%                        | 18+                 | –                           | –  | –   | •  |    |
|                                                                         |                            | 2000              | CATI                   | 7 612        | 58%                        | 18+                 | –                           | –  | –   | •  |    |
|                                                                         |                            | 2005              | CATI                   | 6 919        | 56%                        | 18+                 | –                           | –  | –   | •  |    |
|                                                                         |                            | 2010              | CATI                   | 7 969        | 52%                        | 18+                 | –                           | –  | –   | •  |    |
| [Sex in Sweden] (SIS) [52,53]                                           | Sweden                     | 1996              | PAPQ                   | 2 810        | 59%                        | 18–74               | –                           | –  | –   | •  |    |
| [The Netherlands Mental Health & Incidence Study] (NEMESIS) [54–57]     | The Netherlands            | 1996              | PAPI                   | 7 076        | 70%                        | 18–64               | •                           | •  | •   | •  |    |
|                                                                         |                            | 2007–09           | PI                     | 6 646        | 65%                        | 18–64               | •                           | •  | •   | •  |    |
| [Chinese Health and Family Life Survey] (CHFLS) [58,59]                 | China <sup>d</sup>         | 1999–00           | CASI                   | 3 821        | 76%                        | 20–64               | –                           | –  | –   | •  |    |
| National Study of Health, Intimacy, and Social Relations (NSHS) [60,61] | Australia                  | 2000              | CATI                   | 1 784        | 58%                        | 18–59               | –                           | –  | –   | •  |    |
| Gender, Alcohol and Culture: An International Study (GENACIS) [62,63]   | multinational <sup>e</sup> | 2000–07           | interview <sup>f</sup> | 44 219       | 15%-96% <sup>g</sup>       | varied <sup>h</sup> | –                           | –  | –   | •  |    |
| [Health Barometer] (Barometer) [64–69]                                  | France                     | 2000              | CATI                   | 13 685       | 93%                        | 12–75               | –                           | –  | –   | •  |    |
|                                                                         |                            | 2005              | CATI                   | 30 514       | 63%                        | 12–75               | –                           | –  | –   | •  |    |
|                                                                         |                            | 2010              | CATI                   | 27 653       | <sup>j</sup>               | 15–85               | –                           | –  | –   | •  |    |
| [Health and Morbidity Survey] (SUSY) [70]                               | Denmark                    | 2000              | PAPQ                   | 14 278       | 64%                        | 16+                 | –                           | –  | –   | •  |    |
| Sexual Abuse and Violence in Ireland (SAVI) [71,72]                     | Ireland                    | 2001              | PATI                   | 3 120        | 71%                        | 18–90               | –                           | –  | –   | •  |    |
| Australian Study of Health and Relationships (ASHR) [73–75]             | Australia                  | 2001–02           | CATI                   | 19 307       | 73%                        | 16–59               | –                           | –  | –   | •  |    |
|                                                                         |                            | 2011–12           | CATI                   | 20 000       | <sup>j</sup>               | 16–69               | –                           | –  | –   | •  |    |
| Second Injury Control and Risk Survey (ICARIS-2) [76]                   | United States              | 2001–03           | TI                     | 9 684        | 48%                        | 18+                 | –                           | –  | –   | •  |    |
| World Mental Health Surveys (WMHS) [77,78]                              | Multinational <sup>k</sup> | 2001–09           | CATI, PAPI             | 51 945       | 45%-88%                    | 18+ <sup>l</sup>    | •                           | •  | •   | •  |    |

(Continued)

Table 1. (Continued)

| Survey                                                                                   | Country        | Year(s) conducted | Mode of Administration | N                   | Response Rate <sup>a</sup> | Age   | Childhood maltreatment type |    |     |    |    |
|------------------------------------------------------------------------------------------|----------------|-------------------|------------------------|---------------------|----------------------------|-------|-----------------------------|----|-----|----|----|
|                                                                                          |                |                   |                        |                     |                            |       | NG                          | EA | EFV | PA | SA |
| Behavioral Risk Factor Surveillance System (BRFSS)                                       |                |                   |                        |                     |                            |       |                             |    |     |    |    |
| Texas [79,80]                                                                            | United States  | 2002              | CATI                   | 6 262               | 46%                        | 18+   | -                           | -  | -   | -  |    |
| Ohio [81,82]                                                                             | United States  | 2003              | CATI                   | 3 875               | 41%                        | 18+   | -                           | -  | -   | -  |    |
| Florida [82,83]                                                                          | United States  | 2008              | CATI                   | 11 069              | 50%                        | 18+   | -                           | -  | -   | -  |    |
| California [83,84]                                                                       | United States  | 2008              | CATI                   | 12 047              | 38%                        | 18+   | -                           | -  | -   | -  |    |
| California [84,85]                                                                       | United States  | 2009              | CATI                   | 18 120              | 43%                        | 18+   | -                           | -  | -   | -  |    |
| California [84,86]                                                                       | United States  | 2010              | CATI                   | 18 587              | 43%                        | 18+   | -                           | -  | -   | -  |    |
| Florida [82,86]                                                                          | United States  | 2010              | CATI                   | 37 419              | 44%                        | 18+   | -                           | -  | -   | -  |    |
| Pennsylvania [86,87]                                                                     | United States  | 2010              | CATI                   | 11 822              | 47%                        | 18+   | -                           | -  | -   | -  |    |
| California [84,88]                                                                       | United States  | 2011              | CATI                   | 18 892 <sup>m</sup> | 35%                        | 18+   | -                           | -  | -   | -  |    |
| National Epidemiologic Survey on Alcohol and Related Conditions—Wave 2 (NESARC2) [89,90] | United States  | 2004–05           | PAPI                   | 34 653              | 87%                        | 20+   | -                           | -  | -   | -  |    |
| {German Surveys} (USUMA) [91–97]                                                         | Germany        | 2005              | PAPQ <sup>n</sup>      | 2 341               | 65% <sup>o</sup>           | 18–93 | -                           | -  | -   | -  |    |
|                                                                                          | Germany        | 2006              | PI                     | 1 287               | 62%                        | 14+   | -                           | -  | -   | -  |    |
|                                                                                          | Germany        | 2007              | PAPQ                   | 2 510               | 62%                        | 14–93 | -                           | -  | -   | -  |    |
|                                                                                          | Germany        | 2008              | PAPQ                   | 5 033               | 62%                        | 14+   | -                           | -  | -   | -  |    |
| [Brazilian National Alcohol Survey] (BNAS) [98–101]                                      | Brazil         | 2010              | PI                     | 2 504               | 56%                        | 14+   | -                           | -  | -   | -  |    |
|                                                                                          | Brazil         | 2005–06           | PAPI                   | 3 007               | 66%                        | 14+   | -                           | -  | -   | -  |    |
|                                                                                          | Brazil         | 2011–12           | PI                     | 4 607               | 77%                        | 14+   | -                           | -  | -   | -  |    |
| [Relationships and Sexuality] (RS) [102–104]                                             | Netherlands    | 2005–06           | Online                 | 4 170               | 28%                        | 19–70 | -                           | -  | -   | -  |    |
|                                                                                          | Netherlands    | 2008–09           | Online                 | 6 428               | 21%                        | 15–70 | -                           | -  | -   | -  |    |
| Adult Psychiatric Morbidity Survey (APMS) [105,106]                                      | United Kingdom | 2007              | CAP, CASI              | 7 353               | 57%                        | 16+   | -                           | -  | -   | -  |    |
| National Intimate Partner and Sexual Violence Survey (NISVS) [107–110]                   | United States  | 2010              | CATI                   | 16 507              | ~31% <sup>p</sup>          | 18+   | -                           | -  | -   | -  |    |
| Canadian Community Health Survey (CCHS) Mental Health [111,112]                          | Canada         | 2011              | CATI                   | 12 727              | 33%                        | 18+   | -                           | -  | -   | -  |    |
| Korean General Social Survey (KGSS) [113, 114]                                           | Korea          | 2012              | PI                     | 1 396               | 56%                        | 18+   | -                           | -  | -   | -  |    |
| {English Survey} (UK) [115]                                                              | United Kingdom | 2013              | CAP, PAPQ              | 4 010               | 54%                        | 18–69 | -                           | -  | -   | -  |    |

(Continued)

Table 1. (Continued)

| Survey     | Country | Year(s) conducted | Mode of Administration | N | Response Rate <sup>a</sup> | Age | Childhood maltreatment type |    |     |    |    |
|------------|---------|-------------------|------------------------|---|----------------------------|-----|-----------------------------|----|-----|----|----|
|            |         |                   |                        |   |                            |     | NG                          | EA | EFV | PA | SA |
| % of total |         |                   |                        |   |                            |     | 24                          | 28 | 34  | 48 | 89 |

Ns represent unique samples except for NCS-2 (2001–03) and MIDUS-2 (2004–06) which were follow-up surveys, *italicized*. NG = Neglect, EA = Emotional abuse, EFV = Exposure to family violence, PA = Physical abuse, SA = Sexual abuse, PAPI = Paper and pencil self-completed questionnaire, PAPQ = Paper and pencil self-completed questionnaire, CAPI = Computer assisted personal interview, CATI = Computer assisted telephone interview, CASI = Computer assisted self-interview, PATI = Paper and pencil telephone interview, PI = Personal interview of undetermined type, TI = Telephone interview of undetermined type.

<sup>a</sup> Unless otherwise noted, response rate is percent of eligible respondents who completed the survey. The conditional RR is presented for the NCS-2 (only those who were in NCS & have not since died are possible respondents.)

<sup>b</sup> CAPI in some remote regions.

<sup>c</sup> At the time of this review, data collection was still ongoing, therefore, N and response rate are estimated.

<sup>d</sup> The CHFLS was administered in 18 provinces: Liaoning, Heilongjiang, Jilin, Gansu, Inner Mongolia, Shaanxi, Hebei, Beijing, Tianjin, Henan, Shandong, Hunan, Anhui, Jiangsu, Zhejiang, Shanghai, Fujian, and Guangdong (<http://popcenter.uchicago.edu/data/chfls.shtml>).

<sup>e</sup> The 18 countries in which the GENACIS was administered with the SA questions were: Argentina, Belize, Brazil, Canada, Costa Rica, Czech Republic, India, Kazakhstan, New Zealand, Nicaragua, Nigeria, Peru, Spain, Sri Lanka, Uganda, United Kingdom (including the Isle of Man), United States of America, Uruguay.

<sup>f</sup> One country used a postal survey, all others used interview. Surveys were administered in person except the US (28% telephone) and Australia and Canada (100% telephone).

<sup>g</sup> Response rate was not available for 7/19 countries.

<sup>h</sup> Usually 18+.

<sup>i</sup> Refusal rate reported as 40%.

<sup>j</sup> Response rate not yet known.

<sup>k</sup> Based on included articles, childhood maltreatment questions are known to have been included in the WMHS in these 22 countries: Belgium, Brazil[Sao Paulo], Bulgaria, China, Columbia, France, Germany, India, Israel, Italy, Japan, Lebanon, Mexico, Netherlands, New Zealand, Nigeria, Romania, South Africa, Spain, Turkey, Ukraine, United States, although all countries did not include all types of childhood maltreatment.

<sup>l</sup> Age of youngest participants varied between countries, ranging from 16–21 years but was typically either 18 or 21.

<sup>m</sup> Calculation based on landline and cell phone distributions (Table 5a and 5b) in Summary Data Quality Report 2011.

<sup>n</sup> USUMA 2005, 2007, 2008 data collection took place in the context of a personal household visit.

<sup>o</sup> Beutel et al. report this as the response rate but also describe 65% as the percentage of the sample that could be contacted, which may not be the same as the percentage who completed an interview.

<sup>p</sup> The overall weighted response rate ranged from 27.5% to 33.6%.

doi:10.1371/journal.pone.0123366.t001



United States than any other country (43%). The sample sizes ranged from 1,287–51,945 and the response rates from 15%–96%. Sexual abuse was assessed most often, followed by physical abuse, exposure to family violence, emotional abuse, and neglect. Four American surveys included all five types of childhood maltreatment: the National Comorbidity Survey (NCS), the Behavioral Risk Factors Surveillance System (BRFSS) California 2008, 2009, and the second cycle of the National Epidemiologic Survey on Alcohol and Related Conditions (NESARC2).

As shown in Tables 2–6, for all types of childhood maltreatment some surveys included items relying on respondents' self-definition (e.g., "As a child, did you ever witness parent/guardian abuse by their spouse/partner?"). Self-definition was most common with sexual abuse (48%), and nine of the 48 surveys assessing sexual abuse included exclusively a self-definition item. Single-items were used to assess exposure to family violence and emotional abuse over 50% of the time. Detailed assessments of childhood maltreatment (+10 items) were usually of sexual abuse (23% of surveys that included sexual abuse) with one of these (National Violence Against Women Survey) also assessing physical abuse in detail. NESARC2 assessed neglect with more than 10 items and also assessed the other four types of maltreatment with six or more items. The majority of the surveys included assessment of various aspects of maltreatment severity such as frequency, immediate harm, perpetrator identity, and age at occurrence.

Table 2 describes 13 surveys that assessed neglect. Items assessing respondents' experiences of going without food and other necessities and of having unmet medical needs were most common, followed by items about emotional neglect such as lack of attention and absence of close relationships with caregivers.

Table 3 describes 15 surveys that assessed respondents' experiences of emotional abuse. Most surveys assessed verbally abusive behaviours such as insults, swearing at, cursing at or doing or saying something to spite or hurt feelings.

Table 4 describes 18 surveys that assessed exposure to family violence. Common behaviours included exposure to a family member being slapped or hit, being pushed, shoved or grabbed, or having something thrown at them. Six surveys dealt with aspects of being exposed to the emotional abuse of another family member in the form of threats of harm.

Table 5 describes 26 surveys that assessed physical abuse. The behaviours assessed most often were: slapped or hit, beaten up, hit with an object, and burned or scalded.

Table 6 describes 48 surveys that assessed sexual abuse. The behaviours assessed most often were rape (oral and/or anal and/or vaginal penetration) followed by molestation.

Included articles contained information about the reliability, validity, or lack thereof, of the childhood maltreatment assessments used in the NCS, the Ontario Health Survey—Mental Health Supplement (OHSUP), NESARC2 and the Korean GSS. Searches for additional materials uncovered evidence for reliability and validity of the childhood maltreatment assessment used on the 2010 survey conducted by the German statistical company, *Unabhängiger Service für Umfragen, Methoden und Analysen* (USUMA 2010), which used a German version of the well-validated Childhood Trauma Questionnaire [116]. In addition, the exposure to family violence item on the Canadian Community Health Survey—Mental Health (CCHS 2012) was drawn from a measure with established reliability and validity [117,118], as were the physical abuse and exposure to family violence items on the General Social Survey—2014 [117, 118]. Many surveys used items modified from existing measures (e.g., the Conflict Tactics Scale [119,120]).

## Discussion

The objectives of this review were to provide information about the existence and nature of population health surveys that assess childhood maltreatment and to provide an evaluation of those assessments.

**Table 2. Description and Assessment of Neglect Measures on 13 Included Surveys, in Chronological Order.**

| Survey/<br>year#                    | Self-<br>defined<br>items | Behaviours included in neglect items |                                     |                                                 |                                              |                                                                      |                                     |                                                                      |                                                          |                                                                                 |                                                     |                                              |                                          |                                | Additional severity/information                                          |                                                                                                             |           |                   |                         |                               |                |
|-------------------------------------|---------------------------|--------------------------------------|-------------------------------------|-------------------------------------------------|----------------------------------------------|----------------------------------------------------------------------|-------------------------------------|----------------------------------------------------------------------|----------------------------------------------------------|---------------------------------------------------------------------------------|-----------------------------------------------------|----------------------------------------------|------------------------------------------|--------------------------------|--------------------------------------------------------------------------|-------------------------------------------------------------------------------------------------------------|-----------|-------------------|-------------------------|-------------------------------|----------------|
|                                     |                           | Unsupervised<br>too young            | Effort into<br>watching<br>over (R) | Failed<br>to protect<br>from<br>known<br>danger | Made to do<br>age<br>inappropriate<br>chores | Parents<br>too<br>drunk/<br>high to<br>take care<br>of the<br>family | Hungry/<br>meals<br>not<br>prepared | Go w/out<br>things you<br>needed<br>(clothing/<br>shoes/<br>hygiene) | Ignore<br>medical<br>needs, fail<br>to give<br>treatment | Not<br>listened to/<br>problems<br>ignored/<br>lack of<br>attention/<br>support | Family<br>looked<br>out for<br>each<br>other<br>(R) | Given/<br>Felt love<br>&<br>affection<br>(R) | Family a<br>source of<br>strength<br>(R) | Close<br>knit<br>family<br>(R) | Close,<br>Confiding<br>relationship<br>w/ parents/<br>other adult<br>(R) | Family<br>helped me<br>feel<br>important/<br>special,<br>believed in<br>me, wanted<br>success for<br>me (R) | Frequency | Immediate<br>Harm | Perpetrator<br>identity | Specification<br>of childhood |                |
| OHSUP/<br>1990–91/1<br>[27]         | -                         | -                                    | -                                   | -                                               | -                                            | -                                                                    | -                                   | -                                                                    | -                                                        | -                                                                               | -                                                   | -                                            | -                                        | -                              | -                                                                        | -                                                                                                           | -         | -                 | -                       | C                             |                |
| NCS/1990–<br>92/5 [29]              | -                         | •                                    | -                                   | -                                               | -                                            | -                                                                    | -                                   | -                                                                    | -                                                        | -                                                                               | -                                                   | -                                            | -                                        | -                              | -                                                                        | -                                                                                                           | -         | -                 | -                       | C                             |                |
| NCS2/<br>2001/5 [30]                | -                         | -                                    | -                                   | -                                               | -                                            | -                                                                    | -                                   | -                                                                    | -                                                        | -                                                                               | -                                                   | -                                            | -                                        | -                              | -                                                                        | -                                                                                                           | -         | -                 | -                       | P                             | C              |
| MIDUS/<br>1995–96/4<br>[39]         | -                         | •                                    | -                                   | -                                               | -                                            | -                                                                    | -                                   | -                                                                    | -                                                        | -                                                                               | -                                                   | -                                            | -                                        | -                              | -                                                                        | -                                                                                                           | -         | -                 | -                       | -                             | C              |
| NEMESIS/<br>1996/2 [55]             | -                         | -                                    | -                                   | -                                               | -                                            | -                                                                    | -                                   | -                                                                    | -                                                        | -                                                                               | -                                                   | -                                            | -                                        | -                              | -                                                                        | -                                                                                                           | -         | -                 | -                       | ID                            | <16            |
| NEMESIS-<br>2/2007–09/<br>3 [57]    | -                         | -                                    | -                                   | -                                               | -                                            | -                                                                    | -                                   | -                                                                    | -                                                        | -                                                                               | -                                                   | -                                            | -                                        | -                              | -                                                                        | -                                                                                                           | -         | -                 | -                       | ID                            | <16            |
| WMHS/<br>2001–09/<br>6–10 [78]      | -                         | •                                    | -                                   | -                                               | -                                            | -                                                                    | -                                   | -                                                                    | -                                                        | -                                                                               | -                                                   | -                                            | -                                        | -                              | -                                                                        | -                                                                                                           | -         | -                 | -                       | P                             | C              |
| NESARC2/<br>2004–05/<br>11–15 [90]  | •                         | -                                    | -                                   | -                                               | -                                            | -                                                                    | -                                   | -                                                                    | -                                                        | -                                                                               | -                                                   | -                                            | -                                        | -                              | -                                                                        | -                                                                                                           | -         | -                 | -                       | P, U                          | 10', <18, RD   |
| USUMA/<br>2006/1 [94]               | -                         | -                                    | -                                   | -                                               | -                                            | -                                                                    | -                                   | -                                                                    | -                                                        | -                                                                               | -                                                   | -                                            | -                                        | -                              | -                                                                        | -                                                                                                           | -         | -                 | -                       | P                             | , <sup>a</sup> |
| USUMA/<br>2010/6–10<br>[97]         | -                         | -                                    | -                                   | -                                               | -                                            | -                                                                    | -                                   | -                                                                    | -                                                        | -                                                                               | -                                                   | -                                            | -                                        | -                              | -                                                                        | -                                                                                                           | -         | -                 | -                       | U                             | <18            |
| BRFSS<br>California/<br>2008/1 [84] | -                         | -                                    | -                                   | -                                               | -                                            | -                                                                    | -                                   | -                                                                    | -                                                        | -                                                                               | -                                                   | -                                            | -                                        | -                              | -                                                                        | -                                                                                                           | -         | -                 | -                       | P                             | C, <18         |
| BRFSS<br>California/<br>2009/1 [84] | -                         | -                                    | -                                   | -                                               | -                                            | -                                                                    | -                                   | -                                                                    | -                                                        | -                                                                               | -                                                   | -                                            | -                                        | -                              | -                                                                        | -                                                                                                           | -         | -                 | -                       | P                             | C, <18         |
| KGGS/<br>2012/5<br>[114]            | -                         | -                                    | -                                   | -                                               | -                                            | -                                                                    | -                                   | -                                                                    | -                                                        | -                                                                               | -                                                   | -                                            | -                                        | -                              | -                                                                        | -                                                                                                           | -         | -                 | -                       | ID                            | <18            |

There are two indications in a cell when some items on the survey are assessed in one way and some in another (e.g., C, <18), • = the survey assessed this characteristic on one or more items; – = the survey did not assess this characteristic on any item; (R) = reverse coded item; P = perpetrator is defined within one or more items as parent or person who raised the respondent; ID = respondents identified the perpetrator in terms of their relationship; U = perpetrator is unspecified (e.g., “people in my family”); C = when respondent was growing up, during childhood or adolescence; RD = precise age at occurrence of maltreating experience was recorded and thus researchers can define; <# = survey defines childhood as the years before this birthday.

<sup>a</sup> Reverse scored. Item read: “How much time and attention did she/he give you when you needed it?”

<sup>b</sup> Item read: “How much could you confide in mother/father about things that were bothering you?”

<sup>c</sup> Age 10 years was specified for “unsupervised too young.”

<sup>d</sup> Item read: “You were comforted by your parents when you were sad?”

<sup>e</sup> Unable to identify specification of childhood.

<sup>f</sup> Reverse scored. Item read “I knew that there was someone to take care of me and protect me.”

<sup>g</sup> Reverse scored. Item read “There was someone to take me to the doctor if I needed it.”

doi:10.1371/journal.pone.0123366.t002

**Table 3. Description and Assessment of Emotional Abuse Measures on 15 Included Surveys, in Chronological Order.**

| Survey/year/<br># items               | Self-<br>defined | Behaviours included in emotional abuse items |                           |                                              |          |                        |                                                             |                             |                                               |                                                                 |                    | Additional severity information                           |                                                           |       |           |                   |                         |                               |
|---------------------------------------|------------------|----------------------------------------------|---------------------------|----------------------------------------------|----------|------------------------|-------------------------------------------------------------|-----------------------------|-----------------------------------------------|-----------------------------------------------------------------|--------------------|-----------------------------------------------------------|-----------------------------------------------------------|-------|-----------|-------------------|-------------------------|-------------------------------|
|                                       |                  | Favoured<br>siblings                         | Stomped<br>out of<br>room | Sulked<br>or<br>refused<br>to talk<br>to you | Insulted | Swore<br>at,<br>cursed | Did or said<br>something<br>to spite or<br>hurt<br>feelings | Punished<br>you<br>unjustly | Threatened<br>to throw<br>something<br>at you | Threatened<br>to hit or<br>harm you,<br>other, or<br>possession | Blackmailed<br>you | Acted<br>such<br>that you<br>feared<br>physical<br>injury | Acted out<br>(e.g.,<br>kicking,<br>smashing<br>of things) | Other | Frequency | Immediate<br>Harm | Perpetrator<br>identity | Specification<br>of childhood |
| NCS/1990-<br>92/2 [29]                | -                | -                                            | •                         | •                                            | •        | •                      | -                                                           | -                           | -                                             | •                                                               | -                  | -                                                         | -                                                         | •     | -         | -                 | ID                      | C                             |
| MIDUS I/<br>1995-96/1<br>[39]         | -                | -                                            | •                         | •                                            | •        | •                      | -                                                           | -                           | -                                             | •                                                               | -                  | -                                                         | -                                                         | •     | -         | -                 | ID                      | C                             |
| NEMESIS/<br>1996/2 [55]               | -                | -                                            | -                         | -                                            | -        | -                      | -                                                           | -                           | -                                             | -                                                               | -                  | -                                                         | -                                                         | -     | -         | -                 | ID                      | <16                           |
| NEMESIS-2/<br>2007-09/3<br>[57]       | -                | -                                            | -                         | -                                            | -        | -                      | -                                                           | -                           | -                                             | -                                                               | -                  | -                                                         | -                                                         | -     | -         | -                 | ID                      | <16                           |
| BRFSS<br>Texas/2002/2<br>[80]         | -                | -                                            | -                         | -                                            | -        | -                      | -                                                           | -                           | -                                             | -                                                               | -                  | -                                                         | -                                                         | -     | -         | -                 | P, A                    | <18                           |
| BRFSS<br>California/<br>2009/1 [84]   | -                | -                                            | -                         | -                                            | -        | -                      | -                                                           | -                           | -                                             | -                                                               | -                  | -                                                         | -                                                         | -     | -         | -                 | P, A                    | C                             |
| BRFSS<br>California/<br>2008/1 [84]   | -                | -                                            | -                         | -                                            | -        | -                      | -                                                           | -                           | -                                             | -                                                               | -                  | -                                                         | -                                                         | -     | -         | -                 | P, A                    | C                             |
| BRFSS<br>California/<br>2011/1 [84]   | -                | -                                            | -                         | -                                            | -        | -                      | -                                                           | -                           | -                                             | -                                                               | -                  | -                                                         | -                                                         | -     | -         | -                 | P, A                    | C, <18                        |
| BRFSS<br>Pennsylvania/<br>2010/1 [87] | -                | -                                            | -                         | -                                            | -        | -                      | -                                                           | -                           | -                                             | -                                                               | -                  | -                                                         | -                                                         | -     | -         | -                 | P                       | <18                           |
| NESARC2/<br>2004-05/3<br>[90]         | -                | -                                            | -                         | -                                            | -        | -                      | -                                                           | -                           | -                                             | -                                                               | -                  | -                                                         | -                                                         | -     | -         | -                 | P                       | <18                           |
| USUMA/<br>2006/1 [94]                 | -                | -                                            | -                         | -                                            | -        | -                      | -                                                           | -                           | -                                             | -                                                               | -                  | -                                                         | -                                                         | -     | -         | -                 | P                       | C                             |
| USUMA/<br>2010/5 [97]                 | -                | -                                            | -                         | -                                            | -        | -                      | -                                                           | -                           | -                                             | -                                                               | -                  | -                                                         | -                                                         | -     | -         | -                 | P                       | <18                           |
| BNADS/<br>2011-12/1<br>[101]          | -                | -                                            | -                         | -                                            | -        | -                      | -                                                           | -                           | -                                             | -                                                               | -                  | -                                                         | -                                                         | -     | -         | -                 | P                       | C, <18                        |
| KGGS/2012/4<br>[114]                  | -                | -                                            | -                         | -                                            | -        | -                      | -                                                           | -                           | -                                             | -                                                               | -                  | -                                                         | -                                                         | -     | -         | -                 | ID                      | <18                           |
| UK/2013/1<br>[115]                    | -                | -                                            | -                         | -                                            | -        | -                      | -                                                           | -                           | -                                             | -                                                               | -                  | -                                                         | -                                                         | -     | -         | -                 | P, A                    | <18                           |

There are two indications in a cell when some items on the survey are assessed in one way and some in another (e.g., P, A). • = the survey assessed this characteristic on one or more items; - = the survey did not assess this characteristic on any item; P = perpetrator is defined within one or more items as parent or person who raised the respondent; A = survey specifies that an adult in the respondent's home was the perpetrator; ID = respondents identified the perpetrator in terms of their relationship; C = when respondent was growing up, during childhood or adolescence; <# = survey defines childhood as the years before this birthday.

<sup>a</sup> Item included "abuse" and "belittle."

<sup>b</sup> Item read: "I felt that someone in family hated me"; "You thought that your parents wished you had never been born."

<sup>c</sup> Item read: "... humiliated you publicly."

<sup>d</sup> Item read: "I was often scorned or got contempt."

**Table 4. Description and Assessment of Measures Assessing Exposure to Family Violence on 18 Included Surveys, in Chronological Order.**

| Survey/year/#                  | Behaviours included in exposure to family violence items |                    |                 |                             |                  |                                |                                     |                            |                       |             |               |                         |                           | Additional Severity Information |                |                |             |           |                             |                            |
|--------------------------------|----------------------------------------------------------|--------------------|-----------------|-----------------------------|------------------|--------------------------------|-------------------------------------|----------------------------|-----------------------|-------------|---------------|-------------------------|---------------------------|---------------------------------|----------------|----------------|-------------|-----------|-----------------------------|----------------------------|
|                                | Self-defined                                             | Directly witnessed | Insulted/cursed | Did/said something to spite | Angry withdrawal | Acted out (kick, smash things) | Threat harm/ threat physical attack | Threw something at someone | Pushed/grabbed/shoved | Slapped/hit | Kicked/bitten | Punched/hit with a fist | Choked/attempted drowning | Hit with object                 | Beat up        | Burned/scalded | Weapon used | Frequency | Victim/perpetrator identity | Specification of childhood |
| NCS/1990–92/3 [29]             | –                                                        | –                  | •               | •                           | •                | •                              | •                                   | •                          | •                     | •           | •             | •                       | •                         | •                               | •              | •              | –           | •         | IPV                         | C                          |
| NAS/1995/4 [45]                | –                                                        | •                  | –               | –                           | –                | –                              | •                                   | –                          | –                     | –           | –             | –                       | –                         | –                               | –              | –              | –           | •         | IPV                         | C                          |
| ICARIS/2001–03/1 [76]          | •                                                        | –                  | –               | –                           | –                | –                              | –                                   | –                          | –                     | –           | –             | –                       | –                         | –                               | –              | –              | –           | –         | IPV                         | C                          |
| WNHS/2001–09/2 [79]            | –                                                        | •                  | –               | –                           | –                | –                              | •                                   | •                          | •                     | •           | •             | •                       | •                         | •                               | •              | •              | •           | •         | U                           | C, RD                      |
| BRFSS Texas/2002/4 [80]        | –                                                        | –                  | –               | –                           | –                | –                              | •                                   | •                          | •                     | •           | •             | •                       | •                         | •                               | •              | •              | •           | •         | M                           | <18                        |
| BRFSS Florida/2008/1 [82]      | –                                                        | –                  | –               | –                           | –                | –                              | –                                   | •                          | •                     | •           | •             | •                       | •                         | •                               | •              | •              | •           | •         | IPV, A                      | <18                        |
| BRFSS Florida/2010/1 [82]      | –                                                        | –                  | –               | –                           | –                | –                              | •                                   | •                          | •                     | •           | •             | •                       | •                         | •                               | •              | •              | •           | •         | IPV, A                      | <18                        |
| BRFSS California/2008/1 [84]   | –                                                        | –                  | –               | –                           | –                | –                              | –                                   | –                          | –                     | –           | –             | –                       | –                         | –                               | –              | –              | –           | •         | IPV, A                      | C, <18                     |
| BRFSS California/2009/1 [84]   | –                                                        | –                  | –               | –                           | –                | –                              | –                                   | –                          | •                     | •           | •             | •                       | •                         | •                               | •              | •              | •           | •         | IPV, A                      | C, <18                     |
| BRFSS California/2011/1 [84]   | –                                                        | –                  | –               | –                           | –                | –                              | –                                   | –                          | •                     | •           | •             | •                       | •                         | •                               | •              | •              | •           | •         | IPV, A                      | C, <18                     |
| BRFSS Pennsylvania/2010/1 [87] | –                                                        | –                  | –               | –                           | –                | –                              | –                                   | –                          | –                     | –           | –             | –                       | –                         | –                               | –              | –              | –           | •         | IPV, A                      | <18                        |
| NESARC2/2004–05/6–10 [90]      | –                                                        | •                  | –               | –                           | –                | –                              | •                                   | •                          | •                     | •           | •             | •                       | •                         | •                               | • <sup>a</sup> | •              | •           | •         | U, M                        | <18, RD                    |
| BNAS/2005–06/2 [99]            | •                                                        | –                  | –               | –                           | –                | –                              | •                                   | –                          | –                     | –           | –             | –                       | –                         | –                               | –              | –              | –           | •         | IPV <sup>b</sup>            | C                          |
| BNIDAS/2011–12/2 [101]         | •                                                        | •                  | –               | –                           | –                | –                              | •                                   | –                          | –                     | –           | –             | –                       | –                         | –                               | –              | –              | –           | •         | IPV <sup>c</sup>            | <18, C                     |
| APMS/2007/2 [108]              | •                                                        | –                  | –               | –                           | –                | –                              | –                                   | –                          | –                     | –           | –             | –                       | –                         | –                               | –              | –              | –           | –         | U                           | <16                        |
| CCHS-MH/2012/1 [112]           | –                                                        | •                  | –               | –                           | –                | –                              | –                                   | –                          | •                     | •           | •             | •                       | •                         | •                               | •              | •              | •           | •         | IPV, A                      | <16                        |
| UK2013/1 [115]                 | –                                                        | –                  | –               | –                           | –                | –                              | –                                   | –                          | •                     | •           | •             | •                       | •                         | •                               | •              | •              | •           | •         | IPV, A                      | <18                        |
| GSS/2014/1 [87]                | –                                                        | •                  | –               | –                           | –                | –                              | –                                   | –                          | •                     | •           | •             | •                       | •                         | •                               | •              | •              | •           | •         | IPV, A                      | <15                        |

There are two indications in a cell when some items on the survey are assessed in one way and some in another (e.g., C, RD). • = the survey assessed this characteristic on one or more items; – = the survey did not assess this characteristic on any item; U = perpetrator and victim are unspecified (e.g., “violence in the home”); IPV = violence between respondent’s parents or respondent’s parent and the parent’s intimate partner; M = violence against respondent’s mother (or other female caretaker); A = survey specifies that “an adult” was the perpetrator or victim; C = when respondent was growing up, during childhood or adolescence; RD = precise age at occurrence of maltreating experience was recorded and thus researchers can define; <# = survey defines childhood as the years before this birthday.

<sup>a</sup> Item read: “repeatedly hit.”

<sup>b</sup> Item read: “physically assault each other or other person.”

<sup>c</sup> Item read: “physically assault each other or other person.”

doi:10.1371/journal.pone.0123366.t004

**Table 5. Description and Assessment of Physical Abuse Measures on 26 Included Surveys, in Chronological Order.**

| Survey/year/<br># items               | Self-<br>defined | Behaviours included in physical abuse items |                               |                 |                |                               |                     |                             |                                   |                        |                    |                         |                                    |                | Additional severity information |           |                   |                         |                               |
|---------------------------------------|------------------|---------------------------------------------|-------------------------------|-----------------|----------------|-------------------------------|---------------------|-----------------------------|-----------------------------------|------------------------|--------------------|-------------------------|------------------------------------|----------------|---------------------------------|-----------|-------------------|-------------------------|-------------------------------|
|                                       |                  | Threw<br>something<br>at                    | Pushed,<br>grabbed,<br>shoved | Slapped,<br>hit | Kicked,<br>bit | Choked,<br>attempted<br>drown | Hit w/<br>object up | Beat<br>w/ gun or<br>weapon | Threatened<br>w/ gun or<br>weapon | Gun/<br>weapon<br>used | Burned,<br>scalded | Punched,<br>hit w/ fist | Spanked,<br>physically<br>punished | Hair<br>pulled | Other                           | Frequency | Immediate<br>harm | Perpetrator<br>identity | Specification<br>of childhood |
| OHSUP/<br>1990–91/6–<br>10 [27]       | -                | •                                           | •                             | •               | •              | •                             | •                   | -                           | -                                 | -                      | •                  | •                       | •                                  | -              | •                               | •         | •                 | ID                      | C                             |
| NCS/1990–<br>92/6–10 [29]             | •                | •                                           | •                             | •               | •              | •                             | •                   | -                           | -                                 | -                      | •                  | •                       | •                                  | -              | •                               | -         | -                 | ID                      | RD                            |
| MIDJUS I/<br>1995–96/2<br>[39]        | -                | •                                           | •                             | •               | •              | •                             | •                   | -                           | -                                 | -                      | •                  | •                       | •                                  | -              | •                               | -         | -                 | ID                      | C                             |
| NVAMS/<br>1995–96/16+<br>[43]         | -                | •                                           | •                             | •               | •              | •                             | •                   | •                           | •                                 | •                      | -                  | -                       | -                                  | •              | -                               | -         | -                 | ID                      | C, RD <sup>a</sup>            |
| NAS/1995/4<br>[45]                    | -                | -                                           | -                             | -               | -              | •                             | •                   | •                           | •                                 | •                      | •                  | -                       | -                                  | -              | -                               | -         | P                 | C                       |                               |
| NAS/2005/4<br>[49]                    | -                | -                                           | -                             | -               | -              | •                             | •                   | •                           | •                                 | •                      | •                  | -                       | -                                  | -              | -                               | -         | ID                | C, <18, RD              |                               |
| NAS/2010/6–<br>10 [51]                | -                | -                                           | -                             | -               | -              | •                             | •                   | •                           | •                                 | •                      | •                  | -                       | -                                  | -              | -                               | -         | ID                | C, <18, RD              |                               |
| NEMESIS/<br>1996/2 [55]               | -                | -                                           | -                             | -               | -              | •                             | •                   | -                           | -                                 | -                      | -                  | -                       | -                                  | •              | -                               | -         | ID                | <16                     |                               |
| NEMESIS-2/<br>2007–09/3<br>[57]       | -                | -                                           | -                             | -               | -              | •                             | •                   | -                           | -                                 | -                      | •                  | X                       | -                                  | -              | -                               | -         | ID                | <16                     |                               |
| ICARIS 2/<br>2001–03/1<br>[76]        | -                | -                                           | •                             | -               | -              | -                             | -                   | -                           | -                                 | -                      | -                  | •                       | -                                  | -              | -                               | -         | P, A              | C                       |                               |
| WMHS/2001–<br>09/6–10 [78]            | -                | •                                           | •                             | •               | •              | -                             | -                   | -                           | -                                 | -                      | •                  | •                       | -                                  | -              | -                               | -         | ID                | C, RD                   |                               |
| BRFSS<br>Texas/2002/2<br>[80]         | -                | -                                           | •                             | -               | -              | -                             | -                   | -                           | -                                 | -                      | -                  | -                       | -                                  | -              | -                               | -         | P                 | <18                     |                               |
| BRFSS<br>California/<br>2008/1 [84]   | •                | -                                           | •                             | •               | •              | -                             | -                   | -                           | -                                 | -                      | -                  | X                       | -                                  | -              | -                               | -         | P, A              | C, <18                  |                               |
| BRFSS<br>California/<br>2009/1 [84]   | •                | -                                           | •                             | •               | •              | -                             | -                   | -                           | -                                 | -                      | -                  | X                       | -                                  | -              | -                               | -         | P, A              | C, <18                  |                               |
| BRFSS<br>California/<br>2011/1 [84]   | •                | -                                           | •                             | •               | •              | -                             | -                   | -                           | -                                 | -                      | -                  | X                       | -                                  | -              | -                               | -         | P, A              | C, <18                  |                               |
| BRFSS<br>Pennsylvania/<br>2010/1 [87] | •                | -                                           | •                             | •               | •              | -                             | -                   | -                           | -                                 | -                      | -                  | -                       | -                                  | -              | -                               | -         | P                 | <18                     |                               |
| NESARC2/<br>2004–05/6–<br>10 [90]     | •                | -                                           | •                             | •               | •              | -                             | -                   | -                           | -                                 | -                      | -                  | -                       | -                                  | -              | -                               | -         | P                 | <18, RD                 |                               |
| BNAS/2005–<br>06/6–10 [99]            | -                | -                                           | -                             | -               | -              | •                             | •                   | •                           | •                                 | •                      | •                  | -                       | -                                  | -              | -                               | -         | P                 | C                       |                               |
| BNDAS/<br>2011–12/6–<br>10 [101]      | -                | -                                           | •                             | -               | -              | •                             | •                   | •                           | •                                 | •                      | •                  | -                       | -                                  | • <sup>b</sup> | -                               | -         | P                 | C, <18                  |                               |
| USUMA/<br>2006/1 [94]                 | -                | -                                           | -                             | -               | -              | -                             | -                   | -                           | -                                 | -                      | -                  | -                       | -                                  | -              | -                               | -         | P                 | C                       |                               |
| USUMA/<br>2010/5 [97]                 | •                | -                                           | -                             | -               | -              | •                             | •                   | •                           | •                                 | •                      | •                  | •                       | -                                  | -              | -                               | -         | -                 | <18                     |                               |

(Continued)

Table 5. (Continued)

| Survey/year/<br># items | Self-<br>defined | Behaviours included in physical abuse items |                               |                 |                |                               |                     |                             |                                   |                        |                    |                         | Additional severity information    |                |       |           |                   |                         |                               |
|-------------------------|------------------|---------------------------------------------|-------------------------------|-----------------|----------------|-------------------------------|---------------------|-----------------------------|-----------------------------------|------------------------|--------------------|-------------------------|------------------------------------|----------------|-------|-----------|-------------------|-------------------------|-------------------------------|
|                         |                  | Threw<br>something<br>at                    | Pushed,<br>grabbed,<br>shoved | Slapped,<br>hit | Kicked,<br>bit | Choked,<br>attempted<br>drown | Hit w/<br>object up | Beat<br>w/ gun or<br>weapon | Threatened<br>w/ gun or<br>weapon | Gun/<br>weapon<br>used | Burned,<br>scalded | Punched,<br>hit w/ fist | Spanked,<br>physically<br>punished | Hair<br>pulled | Other | Frequency | Immediate<br>harm | Perpetrator<br>identity | Specification<br>of childhood |
| APMS/2007/2<br>[106]    | -                | -                                           | -                             | -               | -              | -                             | -                   | -                           | -                                 | -                      | -                  | -                       | -                                  | -              | -     | -         | -                 | P                       | <16, RD                       |
| GSS/2009/4<br>[35]      | • <sup>c</sup>   | -                                           | -                             | -               | -              | -                             | -                   | -                           | -                                 | -                      | -                  | -                       | -                                  | -              | -     | -         | -                 | ID                      | <15                           |
| GSS/2014/4<br>[37]      | •                | •                                           | •                             | •               | •              | •                             | •                   | •                           | •                                 | •                      | •                  | X                       | -                                  | -              | •     | -         | -                 | ID, A                   | <15                           |
| KGSS/2012/7<br>[114]    | -                | •                                           | •                             | •               | •              | -                             | -                   | -                           | -                                 | •                      | •                  | •                       | -                                  | -              | -     | -         | -                 | ID                      | <18                           |
| UK/2013/1<br>[115]      | •                | -                                           | •                             | •               | •              | -                             | -                   | -                           | -                                 | -                      | -                  | X                       | -                                  | -              | •     | -         | -                 | P, A                    | <18                           |

There are multiple indications in a cell when some items on the survey are assessed in one way and some in another (e.g., C, RD). • = the survey assessed this characteristic on one or more items; - = the survey did not assess this characteristic on any item; P = perpetrator is defined within one or more items as parent or person who raised the respondent; A = survey specifies that an adult in the respondent's home was the perpetrator; ID = respondents identified the perpetrator in terms of their relationship; C = when respondent was growing up, during childhood or adolescence; RD = precise age at occurrence of maltreating experience was recorded and thus researchers can define; <# = survey defines childhood as the years before this birthday; X = an item explicitly ruled out spanking.

<sup>a</sup> Respondents indicated their age at the last time a victimization experience happened to them.

<sup>b</sup> Item read: "... scratched, pinched, knocked."

<sup>c</sup> Item read: "assault (face-to-face threat or assault with or without a weapon but neither theft nor attempted theft of property)."

doi:10.1371/journal.pone.0123366.t005

**Table 6. Description and Assessment of Sexual Abuse Measures on 48 Included Surveys, in Chronological Order.**

| Survey/year/# items          | Self-defined | Behaviours included in sexual abuse items |                    |               |                    |                                           |                     |                    |                          |                              |                                         |                                      | Additional severity information |       |           |                |                      |                            |
|------------------------------|--------------|-------------------------------------------|--------------------|---------------|--------------------|-------------------------------------------|---------------------|--------------------|--------------------------|------------------------------|-----------------------------------------|--------------------------------------|---------------------------------|-------|-----------|----------------|----------------------|----------------------------|
|                              |              | Noncontact                                | Threat to rape you | Kiss sexually | Photo, video taken | Molestation/ touch sex parts of your body | Made to touch other | Made to masturbate | Rub genitals against you | Receive oral/genital contact | Attempt sex assault (oral/anal/vaginal) | Rape (oral/anal/vaginal penetration) | Insert object                   | Other | Frequency | Immediate Harm | Perpetrator identity | Specification of childhood |
| OHSUP/1990-1/6-10 [27]       | •            | •                                         | -                  | -             | -                  | •                                         | -                   | -                  | -                        | -                            | -                                       | -                                    | -                               | -     | -         | •              | ID                   | C                          |
| NCS/1990-92/6-10 [29]        | -            | -                                         | -                  | -             | -                  | -                                         | -                   | -                  | -                        | -                            | -                                       | -                                    | -                               | -     | -         | -              | ID                   | RD                         |
| NHLS/1992/16+ [31]           | •            | -                                         | -                  | -             | •                  | •                                         | -                   | -                  | •                        | -                            | -                                       | -                                    | • <sup>a</sup>                  | -     | -         | -              | ID                   | RD                         |
| GSS/1999/2 [33]              | -            | -                                         | -                  | -             | •                  | -                                         | -                   | -                  | -                        | -                            | -                                       | -                                    | -                               | -     | -         | -              | -                    | RD                         |
| GSS/2009/4 [35]              | -            | -                                         | -                  | -             | •                  | -                                         | -                   | -                  | •                        | -                            | -                                       | -                                    | -                               | -     | -         | -              | ID                   | <15                        |
| GSS/2014/3 [37]              | •            | -                                         | -                  | -             | •                  | -                                         | -                   | -                  | •                        | -                            | -                                       | -                                    | -                               | -     | -         | -              | ID, A                | <15                        |
| NVAWS/1995-96/11-15 [43]     | -            | -                                         | -                  | -             | -                  | -                                         | -                   | -                  | •                        | -                            | -                                       | -                                    | -                               | -     | -         | -              | ID                   | RD                         |
| SIS/1996/16+ [53]            | -            | -                                         | -                  | -             | •                  | •                                         | -                   | -                  | •                        | -                            | -                                       | -                                    | -                               | -     | -         | -              | ID                   | RD                         |
| NEMESIS/1996/3 [55]          | -            | -                                         | -                  | -             | •                  | •                                         | -                   | -                  | -                        | -                            | -                                       | -                                    | -                               | -     | -         | -              | ID                   | <16                        |
| NEMESIS-2/2007-09/11-15 [57] | •            | -                                         | -                  | -             | •                  | -                                         | -                   | -                  | -                        | -                            | -                                       | -                                    | -                               | -     | -         | -              | ID                   | <16                        |
| CHFLS/1999-00/16+ [59]       | -            | -                                         | -                  | -             | -                  | -                                         | -                   | -                  | -                        | -                            | -                                       | -                                    | -                               | -     | -         | •              | ID                   | <14, RD                    |
| NSHS/2000/11-15 [61]         | -            | -                                         | -                  | -             | •                  | •                                         | -                   | -                  | •                        | -                            | -                                       | -                                    | • <sup>b</sup>                  | -     | -         | -              | -                    | <16, RD                    |
| NAS/2000/2 [47]              | -            | -                                         | -                  | -             | •                  | •                                         | -                   | -                  | -                        | -                            | -                                       | -                                    | -                               | -     | -         | -              | -                    | C, <18, RD                 |
| NAS/2005/4 [49]              | -            | -                                         | -                  | -             | •                  | •                                         | -                   | -                  | -                        | -                            | -                                       | -                                    | -                               | -     | -         | -              | ID                   | C, <18, RD                 |
| NAS/2010/6-10 [51]           | -            | -                                         | -                  | -             | •                  | •                                         | -                   | -                  | -                        | -                            | -                                       | -                                    | -                               | -     | -         | -              | ID                   | C, <18, RD                 |
| GENACIS/2000/2 [63]          | •            | -                                         | -                  | -             | -                  | -                                         | -                   | -                  | -                        | -                            | -                                       | -                                    | -                               | -     | -         | -              | ID <sup>d</sup>      | <16                        |
| Barometer/2000/4 [65]        | -            | -                                         | -                  | -             | •                  | -                                         | -                   | -                  | -                        | -                            | -                                       | -                                    | -                               | -     | -         | -              | -                    | RD                         |
| Barometer/2005/4 [67]        | -            | -                                         | -                  | -             | •                  | -                                         | -                   | -                  | -                        | -                            | -                                       | -                                    | -                               | -     | -         | -              | -                    | RD                         |
| Barometer/2010/2 [69]        | -            | -                                         | -                  | -             | •                  | -                                         | -                   | -                  | -                        | -                            | -                                       | -                                    | -                               | -     | -         | -              | -                    | RD                         |
| SUSY/2000/2 [70]             | •            | -                                         | -                  | -             | -                  | -                                         | -                   | -                  | -                        | -                            | -                                       | -                                    | -                               | -     | -         | -              | ID                   | <18 <sup>e</sup>           |
| ASHR/2001/3 [74]             | •            | -                                         | -                  | -             | -                  | -                                         | -                   | -                  | -                        | -                            | -                                       | -                                    | -                               | -     | -         | -              | -                    | RD                         |
| ASHR/2011-12/3 [75]          | •            | -                                         | -                  | -             | -                  | -                                         | -                   | -                  | -                        | -                            | -                                       | -                                    | -                               | -     | -         | -              | -                    | RD                         |
| SAVI/2001/16+ [72]           | -            | -                                         | -                  | -             | •                  | •                                         | -                   | -                  | •                        | -                            | -                                       | -                                    | -                               | -     | -         | •              | ID                   | <17                        |
| ICARIS-2/2001-03/11-15 [76]  | -            | -                                         | -                  | -             | -                  | -                                         | -                   | -                  | -                        | -                            | -                                       | -                                    | -                               | -     | -         | -              | ID                   | RD                         |
| WMHS/2001-09/6-10 [78]       | -            | -                                         | -                  | -             | •                  | -                                         | -                   | -                  | -                        | -                            | -                                       | -                                    | -                               | -     | -         | -              | ID                   | RD                         |
| BRFSS Texas/2002/4 [80]      | -            | -                                         | -                  | -             | •                  | •                                         | -                   | -                  | -                        | -                            | -                                       | -                                    | -                               | -     | -         | -              | A                    | <18                        |
| BRFSS Ohio/2003/2 [82]       | •            | -                                         | -                  | -             | -                  | -                                         | -                   | -                  | -                        | -                            | -                                       | -                                    | -                               | -     | -         | -              | ID                   | <18                        |
| BRFSS California/2008/1 [84] | -            | -                                         | -                  | -             | •                  | •                                         | -                   | -                  | -                        | -                            | -                                       | -                                    | -                               | -     | -         | -              | A                    | C                          |
| BRFSS California/2009/1 [84] | -            | -                                         | -                  | -             | •                  | •                                         | -                   | -                  | -                        | -                            | -                                       | -                                    | -                               | -     | -         | -              | A                    | C                          |
| BRFSS California/2010/1 [84] | •            | -                                         | -                  | -             | -                  | -                                         | -                   | -                  | -                        | -                            | -                                       | -                                    | -                               | -     | -         | -              | -                    | <18                        |
| BRFSS California/2011/4 [84] | •            | -                                         | -                  | -             | •                  | •                                         | -                   | -                  | -                        | -                            | -                                       | -                                    | -                               | -     | -         | -              | A                    | C, <18                     |

(Continued)

Table 6. (Continued)

| Survey/year/# items             | Self-defined | Behaviours included in sexual abuse items |                    |               |                    |                                           |                     |                    |                          |                              |                                         | Additional severity information      |               |       |           |                |                      |                            |
|---------------------------------|--------------|-------------------------------------------|--------------------|---------------|--------------------|-------------------------------------------|---------------------|--------------------|--------------------------|------------------------------|-----------------------------------------|--------------------------------------|---------------|-------|-----------|----------------|----------------------|----------------------------|
|                                 |              | Noncontact                                | Threat to rape you | Kiss sexually | Photo, video taken | Molestation/ touch sex parts of your body | Made to touch other | Made to masturbate | Rub genitals against you | Receive oral/genital contact | Attempt sex assault (oral/anal/vaginal) | Rape (oral/anal/vaginal penetration) | Insert object | Other | Frequency | Immediate Harm | Perpetrator identity | Specification of childhood |
| BRFSS Pennsylvania/2010/2 [87]  | -            | -                                         | -                  | -             | -                  | -                                         | -                   | -                  | -                        | -                            | -                                       | -                                    | -             | -     | -         | -              | A                    | <18                        |
| MIDUS II/2004-5/3 [41]          | •            | -                                         | -                  | -             | -                  | -                                         | -                   | -                  | -                        | -                            | -                                       | -                                    | -             | -     | -         | -              | -                    | RD                         |
| NESARC II/2004-05/6-10 [90]     | -            | -                                         | -                  | -             | -                  | -                                         | -                   | -                  | -                        | -                            | -                                       | -                                    | -             | -     | -         | -              | -                    | RD, <18                    |
| USUMA/2005/1 [92]               | •            | -                                         | -                  | -             | -                  | -                                         | -                   | -                  | -                        | -                            | -                                       | -                                    | -             | -     | -         | -              | -                    | <14                        |
| USUMA/2007/1 [92]               | •            | -                                         | -                  | -             | -                  | -                                         | -                   | -                  | -                        | -                            | -                                       | -                                    | -             | -     | -         | -              | -                    | <14                        |
| USUMA/2008/1 [92]               | •            | -                                         | -                  | -             | -                  | -                                         | -                   | -                  | -                        | -                            | -                                       | -                                    | -             | -     | -         | -              | -                    | <14                        |
| USUMA/2010/5 [97]               | •            | -                                         | -                  | -             | -                  | -                                         | -                   | -                  | -                        | -                            | -                                       | -                                    | -             | -     | -         | -              | -                    | <18                        |
| BNAS/2005-06/1 [99]             | •            | -                                         | -                  | -             | -                  | -                                         | -                   | -                  | -                        | -                            | -                                       | -                                    | -             | -     | -         | -              | P                    | C                          |
| BNDAS/2011-12/3 [101]           | -            | -                                         | -                  | -             | -                  | -                                         | -                   | -                  | -                        | -                            | -                                       | -                                    | -             | -     | -         | -              | ID                   | C, <18                     |
| RS/2005-06/2 <sup>a</sup> [102] | •            | -                                         | -                  | -             | -                  | -                                         | -                   | -                  | -                        | -                            | -                                       | -                                    | -             | -     | -         | -              | -                    | <16                        |
| RS/2008-09/16+ [104]            | •            | -                                         | -                  | -             | -                  | -                                         | -                   | -                  | -                        | -                            | -                                       | -                                    | -             | -     | -         | -              | ID                   | <16, RD                    |
| APMS/2007/5 [106]               | •            | -                                         | -                  | -             | -                  | -                                         | -                   | -                  | -                        | -                            | -                                       | -                                    | -             | -     | -         | -              | -                    | <16, RD                    |
| NISVS/2010/16+ [109]            | -            | -                                         | -                  | -             | -                  | -                                         | -                   | -                  | -                        | -                            | -                                       | -                                    | -             | -     | -         | -              | ID                   | RD                         |
| NISVS/2011/16+ [110]            | -            | -                                         | -                  | -             | -                  | -                                         | -                   | -                  | -                        | -                            | -                                       | -                                    | -             | -     | -         | -              | ID                   | RD                         |
| CCHS-MH/2012/2 [112]            | •            | -                                         | -                  | -             | -                  | -                                         | -                   | -                  | -                        | -                            | -                                       | -                                    | -             | -     | -         | -              | A                    | <16                        |
| KGSS/2012/3 [114]               | •            | -                                         | -                  | -             | -                  | -                                         | -                   | -                  | -                        | -                            | -                                       | -                                    | -             | -     | -         | -              | ID                   | <18                        |
| UK2013/3 [115]                  | -            | -                                         | -                  | -             | -                  | -                                         | -                   | -                  | -                        | -                            | -                                       | -                                    | -             | -     | -         | -              | A                    | <18                        |

There are two indications in a cell when some items on the survey are assessed in one way and some in another (e.g., C, RD). • = the survey assessed this characteristic on one or more items; - = the survey did not assess this characteristic on any item; P = perpetrator is defined within one or more items as parent or person who raised the respondent; ID = respondents identified the perpetrator in terms of their relationship; A = survey specifies that "an adult" or someone 5+ years than respondent was the perpetrator; C = when respondent was growing up, during childhood or adolescence; RD = precise age at occurrence of maltreating experience was recorded and thus researchers can define; <# = survey defines childhood as the years before this birthday.

<sup>a</sup> Item read: "Active anal intercourse, rubbing genitals on perpetrator's body..."

<sup>b</sup> Age at onset and offset were recorded.

<sup>c</sup> Item read: "Before the age of 16, did someone try to sexually arouse you when you did not want them to?"

<sup>d</sup> Family vs. non-family perpetrators were distinguished.

<sup>e</sup> Childhood defined as under the age of 13. Adolescence defined 13–17.

<sup>f</sup> Item read: "Have you ever received money for sex before the age of 18?"

<sup>g</sup> Estimated, 2 known items.

doi:10.1371/journal.pone.0123366.t006



Our review allows discussion of some general characteristics of the included surveys. We identified more surveys in later years compared to earlier years that assessed childhood maltreatment and this may reflect either an increasing number of population-representative surveys or an increasing proportion of such surveys that included childhood maltreatment. Given the successful uses of several high profile surveys to explore the long-term health importance of child maltreatment [121,122] and statements about child maltreatment prevention as preventive of chronic disease and other costly health issues [123,124], there may be a new willingness among sponsors of recent surveys to include childhood maltreatment assessment.

In the early 1990s, interview method was predominantly personal, in contrast to surveys conducted since 2009, which were almost all computer-assisted telephone interviews. The only on-line (web based) surveys that met inclusion criteria were conducted recently (2005–2009). Given evidence that research participants may prefer to disclose victimization using a computer rather than to an interviewer [125], online surveys may have potential to advance research in this area. However, based on sampling theory and a simulation study, Bethlehem concluded that self-selection web surveys have “no role” in creation of accurate estimates of population characteristics [126]. Thus, the utility of online surveys for future research in this area is uncertain.

Childhood maltreatment was conceptualized using exclusively self-defined items on eight surveys that assessed sexual abuse, two for physical abuse, and two for exposure to family violence; self-defined items were also sometimes used in concert with behaviour-based items. Enhancing quality by use of items that are behaviour specific (versus those that are self-defined or interpretative) has been previously discussed [117,127].

Despite longstanding calls for use of high quality measures [24], we found evidence for the reliability and/or validity of the childhood maltreatment assessments on only seven of the 54 included surveys. The Composite International Diagnostic Inventory (CIDI) formed a part of several surveys, and includes a checklist of life events that includes childhood maltreatment. The CIDI has well established validity and reliability [128], but Kessler et al [129] have noted the potential difficulties in assessing life adversities with checklists. Further examination of the specific items used in the surveys indicated that few were used in formats identical to those tested for reliability and/or validity; the psychometric properties of nearly all measures were uncertain.

Maltreatment types commonly co-occur, and study of single types in isolation has been decried [130–132]. Assessment of multiple types of maltreatment is important for understanding which forms of maltreatment co-occur and how different forms of maltreatment, and their co-occurrence, are risk factors for later health outcomes [130]. Although 14 surveys included more than three forms of childhood maltreatment, we found that half the surveys assessed a single type of childhood maltreatment, and almost always that single type was sexual abuse. We confirmed earlier findings [133,134] that sexual abuse is researched more than other types of maltreatment. Note, however, that our definition of sexual abuse was broader than that for other types of maltreatment. Also, the preponderance of sexual abuse assessments on surveys may be explained, in part, by research related to sexual health and HIV transmission risk factors [21].

Limitations of our work include the following: The total number of surveys identified was not recorded. In keeping with earlier recommendations [25], our assessment checklist tools were carefully developed, but their reliability and validity have not been tested. Stoltenborgh et al.’s review [135] noted the inherent conceptual difficulties of the definition and measurement of child neglect; our neglect tool content should in particular be validated by further research.

Although we searched comprehensively, it is unlikely that all existing surveys have been identified, especially non-English ones. We limited our scope by excluding surveys and articles in which the sample was subnational or in which a segment of the population with an age

range smaller than 40 years was targeted because they did not meet our definition of representativeness [136,137].

Despite our international perspective, our inclusion criteria may have resulted in selection of material constructed around concerns held predominantly by Western scientists and policy makers. For example, surveys concerned with child morbidity and mortality were excluded [138–140], although such work may be of key concern in low income countries. Items on the neglect checklist may be particularly Western-centric, in that omissions of care and nurturing seen as “neglect” in one culture may not be seen as problematic in another [141]. Tausig [142] discussed the importance of methodological factors and cultural contexts in understanding health estimates derived from international surveys, and a similar perspective may be useful in this context considering that most survey assessments of childhood maltreatment originate from one culture.

A final limitation of this review is that some information of potential interest was not coded, such as accessibility of the data for secondary analyses, which cannot be assumed to be straightforward, as noted for example by Thompson and Xiajie [143]. We did not assess the availability of measures of non-maltreatment childhood adversity (e.g., poverty) nor childhood supportive relationships (except where such measures, reverse coded, could be seen as indicators of emotional neglect) despite evidence that both are important to adult health outcomes [144–146].

This systematic review, enhanced by Internet searches and consultations with experts, represents a unique assessment of 54 diverse population-representative surveys conducted internationally since 1990 that measured both childhood maltreatment and adult health. This study has a number of strengths. Due to a weighty reliance on grey literature, publication bias is probably not an issue. The process we followed enhanced the quality of the review; basing our tools on survey content, as it emerged, allowed for the diversity of content to be represented; coders represented multiple disciplines; disagreements were resolved by consensus. In addition, in terms of content extraction each identified survey was thoroughly searched; our tools captured diverse surveys’ highly varied childhood maltreatment content from within multiple modules (e.g., “post-traumatic stress disorder”, “childhood”, “background information”, “sexual violence”, “life event history”).

The absence of validated measures and failure to assess multiple types of childhood maltreatment are two concerns in this body of work. Important questions for future work are: Can both these concerns be addressed within surveys that must have the minimum possible administrative and response burdens? If not, which concern is more important to address? Evidence indicates that single-item measures of childhood maltreatment are associated with under-reporting. However, other research indicates no clear effect of maltreatment means of assessment on the strength of the relation with health outcomes [147] and single-item measures of childhood maltreatment predict adult health outcomes [137].

Routine inclusion of childhood maltreatment assessment on surveys with any health content would allow further understanding of child maltreatment as a risk factor for various adverse health outcomes throughout the lifespan including those with high social costs, such as chronic disease. Our review demonstrates the feasibility of inclusion and provides diverse examples of previous assessments. A future paper will examine the strength of the observed relationships between childhood maltreatment and health outcome measures (e.g., mental illness, chronic illness such as cancer).

Population-representative surveys are a key source of data to inform public policy about child maltreatment as a preventable problem associated with negative health outcomes. To our knowledge this is a unique, comprehensive search and description of health and social surveys and assessment of their childhood maltreatment content. It is our hope that health researchers who recognize the importance of childhood maltreatment will benefit from knowing on what

surveys childhood maltreatment items have been included, and the nature of the surveys and of the items.

## Supporting Information

**S1 PRISMA Checklist. PRISMA 2009 Checklist.**

(DOC)

**S1 Protocol. Research Protocol for A Systematic Review of Childhood Maltreatment Assessments in Population-Representative Surveys Since 1990.**

(DOCX)

## Acknowledgments

The authors gratefully acknowledge the technical assistance of Jasminka Draca.

## Author Contributions

Conceived and designed the experiments: WH LT. Wrote the paper: WH AC LT DP. Wrote the protocol, with input from the others: WH. Extracted and categorised the data: AC WH DP LT. Led the evaluative component: LT. Led the analysis of the measures' reliability: DP.

## References

1. Tonmyr L, Ouimet C, Ugnat A-M. A review of findings from the Canadian Incidence Study of Reported Child Abuse and Neglect (CIS). *Can J Public Health*. 2012; 103–112. PMID: [22530531](#)
2. Leeb RT, Paulozzi LJ, Melanson C, Simon TR, Arias I. Child maltreatment surveillance: Uniform definitions for public health and recommended data elements. Centers for Disease Control and Prevention. Atlanta, 2008.
3. Gilbert R, Widom CS, Browne K, Fergusson D, Webb E, Janson S. Child maltreatment 1. Burden and consequences of child maltreatment in high-income countries. *Lancet*. 2009; 373: 68–81. doi: [10.1016/S0140-6736\(08\)61706-7](#) PMID: [19056114](#)
4. Fergusson DM, Horwood LJ, Woodward LJ. The stability of child abuse reports: A longitudinal study of the reporting behaviour of young adults. *Psychol Med*. 2000; 30: 529–544. PMID: [10883709](#)
5. Widom CS, Shepard RL. Accuracy of adult recollections of childhood victimization: Part 1. Childhood physical abuse. *Psychol Assess*. 1996; 8: 412.
6. Widom CS, Morris S. Accuracy of adult recollections of childhood victimization: Part 2. Childhood sexual abuse. *Psychol Assess*. 1997; 9: 34.
7. Williams LM. Recall of childhood trauma: A prospective study of women's memories of child sexual abuse. *J Consult Clin. Psychol*. 1994; 62: 1167. PMID: [7860814](#)
8. Springer KW, Sheridan J, Kuo D, Carnes M. Long-term physical and mental health consequences of childhood physical abuse: Results from a large population-based sample of men and women. *Child Abuse Negl*. 2007; 31: 517–530. PMID: [17532465](#)
9. Scott KM, Smith DR, Ellis PM. Prospectively ascertained child maltreatment and its association with DSM-IV mental disorders in young adults. *Arch Gen Psychiatry*. 2010; 67: 712–719. doi: [10.1001/archgenpsychiatry.2010.71](#) PMID: [20603452](#)
10. Norman RE, Byambaa M, De R, Butchart A, Scott J, Vos T. The long-term health consequences of child physical abuse, emotional abuse, and neglect: A systematic review and meta-analysis. *PLOS Med*. 2012; 9: e1001349. doi: [10.1371/journal.pmed.1001349](#) PMID: [23209385](#)
11. Macmillan HL, Tanaka M, Duku E, Vaillancourt T, Boyle MH. Child physical and sexual abuse in a community sample of young adults: Results from the Ontario Child Health Study. *Child Abuse Negl*. 2013; 37: 14–21. doi: [10.1016/j.chiabu.2012.06.005](#) PMID: [23290623](#)
12. Fisher MA. Ethics for the pediatrician: Caring for abused children. *Pediatr Rev*. 2011; 32: e73–e78. doi: [10.1542/pir.32-7-e73](#) PMID: [21724900](#)
13. Tonmyr L, Hovdestad W, Draca J. Commentary on Canadian child maltreatment data. *J Interpers Violence*. 2014; 29: 186–197. doi: [10.1177/0886260513504643](#) PMID: [24097903](#)

14. Mäkelä P, Huhtanen P. The effect of survey sampling frame on coverage: The level of and changes in alcohol-related mortality in Finland as a test case. *Addiction*. 2010; 105: 1935–1941. doi: [10.1111/j.1360-0443.2010.03069.x](https://doi.org/10.1111/j.1360-0443.2010.03069.x) PMID: [21040059](https://pubmed.ncbi.nlm.nih.gov/21040059/)
15. Perales J, Olaya B, Fernandez A, Alonso J, Vilagut G, Forero CG, et al. Association of childhood adversities with the first onset of mental disorders in Spain: Results from the ESEMeD project. *Soc Psychiatry Psychiatr Epidemiol*. 2013; 48: 371–384. doi: [10.1007/s00127-012-0550-5](https://doi.org/10.1007/s00127-012-0550-5) PMID: [22872358](https://pubmed.ncbi.nlm.nih.gov/22872358/)
16. Kendall-Tackett K, Becker-Blease K. The importance of retrospective findings in child maltreatment research. *Child Abuse Negl*. 2004; 28: 723–727. PMID: [15261467](https://pubmed.ncbi.nlm.nih.gov/15261467/)
17. Shaffer A, Huston L, Egeland B. Identification of child maltreatment using prospective and self-report methodologies: A comparison of maltreatment incidence and relation to later psychopathology. *Child Abuse Negl*. 2008; 32: 682–692. doi: [10.1016/j.chiabu.2007.09.010](https://doi.org/10.1016/j.chiabu.2007.09.010) PMID: [18638626](https://pubmed.ncbi.nlm.nih.gov/18638626/)
18. Dube SR, Williamson DF, Thompson T, Felitti VJ, Anda RF. Assessing the reliability of retrospective reports of adverse childhood experiences among adult HMO members attending a primary care clinic. *Child Abuse Negl*. 2004; 28: 729–737. PMID: [15261468](https://pubmed.ncbi.nlm.nih.gov/15261468/)
19. Hardt J, Vellaisamy P, Schoon I. Sequelae of prospective versus retrospective reports of adverse childhood experiences. *Psychol Rep*. 2010; 107: 425–440. PMID: [21117468](https://pubmed.ncbi.nlm.nih.gov/21117468/)
20. Hovdestad WE, Tonmyr L. Proposal of childhood maltreatment questions for inclusion on a Canadian national health survey: Notes from the process. *ISPCAN World Perspectives on Child Abuse 9th Edition*; 2010. p. 43–48.
21. Laumann EO, Gagnon JH, Michael RT, Michaels S. *The social organization of sexuality: Sexual practices in the United States*. Chicago: University of Chicago Press; 1994. PMID: [17851747](https://pubmed.ncbi.nlm.nih.gov/17851747/)
22. Smith A, Rissell CE, Richters J, Grulich AE, Visser RO. Sex in Australia: The rationale and methods of the Australian study of health and relationships. *Aust N Z J Public Health*. 2003; 27: 106–117. PMID: [14696700](https://pubmed.ncbi.nlm.nih.gov/14696700/)
23. Ritacco G, Suffla S. A critical review of child maltreatment indices: Psychometric properties and application in the South African context. *Afr Saf Promot*. 2012; 10: 3–17.
24. Tonmyr L, Draca J, Crain J, MacMillan HL. Measurement of emotional/psychological child maltreatment: A review. *Child Abuse Negl*. 2011; 35: 767–782. doi: [10.1016/j.chiabu.2011.04.011](https://doi.org/10.1016/j.chiabu.2011.04.011) PMID: [22018520](https://pubmed.ncbi.nlm.nih.gov/22018520/)
25. Sanderson S, Tatt ID, Higgins JP. Tools for assessing quality and susceptibility to bias in observational studies in epidemiology: A systematic review and annotated bibliography. *Int J Epidemiol*. 2007; 36: 666–676. PMID: [17470488](https://pubmed.ncbi.nlm.nih.gov/17470488/)
26. MacMillan HL, Fleming JE, Streiner DL, Lin E, Boyle MH, Jamison E et al. Childhood abuse and lifetime psychopathology in a community sample. *Am J Psych*. 2001; 158: 1878–1883.
27. MacMillan HL. Email sent to: Aimée Campeau. 19th September 2013.
28. Kessler RC, Gruber M, Hettema JM, Hwang I, Sampson N, Yonkers KA. Co-morbid major depression and generalized anxiety disorders in the national comorbidity survey follow-up. *Psychol Med*. 2008; 38: 65.
29. Kessler R. National Comorbidity Survey, 1990–1992: Part 1 Data Collection Instrument for NCS Main Data. Harvard Medical School. July 2002 [cited 30 June 2014]. Available: <http://www.hcp.med.harvard.edu/ncs/ftpd/Dir/Baseline%20NCS.pdf>
30. Kessler R. NCS-2 Interview Schedule and Respondent Booklet. Harvard Medical School. 2005 [cited 30 June 2014]. Available: <http://www.hcp.med.harvard.edu/ncs/reinterview.php>.
31. Laumann E, Gagnon J, Michael R, Michaels S. National Health and Social Life Survey, 1992 [United States] Codebook. National Opinion Research Center, University of Chicago. date unknown [cited 30 June 2014]. Available: <http://popcenter.uchicago.edu/data/nhsls.shtml>
32. Daigneault I, Hébert M, McDuff P. Men's and women's childhood sexual abuse and victimization in adult partner relationships: A study of risk factors. *Child Abuse Negl*. 2009; 33: 638–647. doi: [10.1016/j.chiabu.2009.04.003](https://doi.org/10.1016/j.chiabu.2009.04.003) PMID: [19811827](https://pubmed.ncbi.nlm.nih.gov/19811827/)
33. Housing, Family and Social Statistics Division, Statistics Canada. Appendix B: General Social Survey, 1999: Cycle 13 Victimization Questionnaire Package. Statistics Canada. 1999 [cited 30 June 2014]. Available: <http://data.library.utoronto.ca/datapub/codebooks/cstldi/gss/gss13/gssc13que.pdf>
34. Perreault S, Brennan S. Criminal Victimization in Canada, 2009. Statistics Canada. 2013 [cited 30 June 2014]. Available: <http://www.statcan.gc.ca/pub/85-002-x/2010002/article/11340-eng.htm#a24>
35. Social and Aboriginal Statistics Division, Statistics Canada. General Social Survey, Cycle 23: Victimization Questionnaire. Statistics Canada. 2011 [cited 30 June 2014]. Available: <http://search2.odesi.ca/documentation/GSS23/gssc-esgc23que-eng.pdf>

36. Statistics Canada. General Social Survey, Cycle 28: Victimization. Statistics Canada. 2014 [cited 26 November 2014]. Available: <http://www23.statcan.gc.ca/imdb/p2SV.pl?Function=getSurvey&SDDS=4504>
37. Statistics Canada. General Social Survey, Cycle 28: Vicimization. Statistics Canada, Questionnaires. 2014 [cited 26 November 2014]. Available: [http://www23.statcan.gc.ca/imdb-bmdi/instrument/4504\\_Q1\\_V6-eng.htm#a101](http://www23.statcan.gc.ca/imdb-bmdi/instrument/4504_Q1_V6-eng.htm#a101)
38. Brim O, Baltes P, Bumpass L, Cleary P, Featherman DL, Hazzard, WR et al. National Survey of Mid-life Development in the United States (MIDUS), 1995–96: Description of MIDUS Samples. Institute on Aging, University of Wisconsin—Madison. 2010 cited 30 June 2014]. Available: <http://www.midus.wisc.edu/midus1/index.php>
39. Brim O, Baltes P, Bumpass L, Cleary P Featherman DL, Hazzard, WR et al. National Survey of Midlife Development in the United States (MIDUS), 1995–96: Self-Administered Questionnaire (SAQ). Institute on Aging, University of Wisconsin—Madison. date unknown [30 June 2014]. Available: <http://www.midus.wisc.edu/midus1/>
40. Ryff C, Almeida D, Ayanian J, Carr D, Cleary PD, Coe C, et al. National Survey of Midlife in the United States (MIDUS II), 2004–06: Description of MIDUS Samples. Institute on Aging, University of Wisconsin—Madison. date unknown [cited 30 June 2014]. Available: <http://www.midus.wisc.edu/midus2/project1/>
41. Ryff C, Almeida D, Ayanian J, Carr D, Cleary PD, Coe C, et al. National Survey of Midlife Development in the United States (MIDUS), 2004–06: Self-Administered Questionnaires 1 & 2. Institute on Aging, University of Wisconsin—Madison. date unknown [cited 30 June 2014]. Available: <http://www.midus.wisc.edu/midus2/project1/>
42. Thompson MP, Kingree JB, Desai S. Gender differences in long-term health consequences of physical abuse of children: Data from a nationally representative survey. *Am J Public Health*. 2004; 94: 599–604. PMID: [15054012](#)
43. Tjaden P, Thoennes N. Violence and Threats of Violence Against Women and Men in the United States, 1994–96. National Institute of Justice, US Department of Justice. 1999 [cited 26 June 2014]. Available: [http://www.chsbs.cmich.edu/angela\\_haddad/data/pdf/violence.pdf](http://www.chsbs.cmich.edu/angela_haddad/data/pdf/violence.pdf) doi: [10.1177/1079063210366271](#) PMID: [20713746](#)
44. Caetano R, Clark CL. Hispanics, Blacks and Whites driving under the influence of alcohol: Results from the 1995 National Alcohol Survey. *Accid Anal Prev*. 2000; 32: 57–64. PMID: [10576676](#)
45. Alcohol Research Group, US Department of Health and Human Services. 1995 National Alcohol Survey Main Questionnaire. Alcohol Research Group, US Department of Health and Human Services. 1995. Available from authors upon request.
46. Midanik LT, Greenfield TK. Defining ‘current drinkers’ in national surveys: Results of the 2000 National Alcohol Survey. *Addiction*. 2003; 98: 517–522. PMID: [12653821](#)
47. Greenfield T, Trocki K. 2000 National Alcohol Survey (N10) Main Questionnaire. Alcohol Research Group, National Alcohol Research Center. 1999. Available from authors upon request.
48. Mulia N, Ye Y, Zemore SE, Greenfield TK. Social disadvantage, stress, and alcohol use among black, Hispanic, and white Americans: Findings from the 2005 US National Alcohol Survey. *J Stud Alcohol Drugs*. 2008; 69: 824. PMID: [18925340](#)
49. Greenfield T, Trocki K, Bond J, Ye Y. 2005 National Alcohol Research Survey (N11) Main Questionnaire. Alcohol Research Group, National Alcohol Research Center. date unknown. Available from authors upon request.
50. Nelson DE, Jarman DW, Rehm J, Greenfield TK, Rey G, et al. Alcohol-attributable cancer deaths and years of potential life lost in the United States. *Am J Public Health*. 2013; 103: 641–648. doi: [10.2105/AJPH.2012.301199](#) PMID: [23409916](#)
51. Greenfield T, Trocki K, Bond J, Ye Y. 2009–10 National Alcohol Survey (N12) Main Questionnaire. Alcohol Research Group, National Alcohol Research Center. date unknown. Available from authors upon request.
52. Steel JL, Herlitz CA. The association between childhood and adolescent sexual abuse and proxies for sexual risk behavior: A random sample of the general population of Sweden. *Child Abuse Negl*. 2005; 29: 1141–1153. PMID: [16243097](#)
53. Folkhälsoinstitut S. Sex in Sweden: On the Swedish sexual life in 1996. Östersund, Sweden: National Institute of Public Health; 2000.
54. Afifi TO, Enns MW, Cox BJ, de Graaf R, ten Have M, Sareen J. Child abuse and health-related quality of life in adulthood. *J Nerv Ment Dis*. 2007; 195: 797–804. PMID: [18043519](#)
55. de Graaf R. Email sent to: Wendy Hovdestad. 18th April 2012.

56. de Graaf R, Ten Have M, van Dorsselaer S. The Netherlands Mental Health Survey and Incidence Study-2 (NEMESIS-2): Design and methods. *Int J Method Psych*. 2010; 19: 125–141. doi: [10.1002/mpr.317](https://doi.org/10.1002/mpr.317) PMID: [20641046](https://pubmed.ncbi.nlm.nih.gov/20641046/)
57. de Graaf R. Email sent to: Wendy Hovdestad. 21th December 2012.
58. Luo Y, Parish WL, Laumann EO. A population-based study of childhood sexual contact in China: Prevalence and long-term consequences. *Child Abuse Negl*. 2008; 32: 721–731. doi: [10.1016/j.chiabu.2007.10.005](https://doi.org/10.1016/j.chiabu.2007.10.005) PMID: [18614231](https://pubmed.ncbi.nlm.nih.gov/18614231/)
59. University of Chicago/National Opinion Research Center, Renmin University, Beijing Union Medical College, University of North Carolina. Chinese Health and Family Life Survey: English Translation. University of Chicago/ National Opinion Research Center. 2003 [cited 30 June 2014]. Available: [http://www.src.uchicago.edu/datalib/chfls/Documentation/CHFLS\\_English\\_1.pdf](http://www.src.uchicago.edu/datalib/chfls/Documentation/CHFLS_English_1.pdf)
60. Najman JM, Dunne MP, Purdie DM, Boyle FM, Coxeter PD. Sexual abuse in childhood and sexual dysfunction in adulthood: An Australian population-based study. *Arch Sex Behav*. 2005; 34: 517–526. PMID: [16211473](https://pubmed.ncbi.nlm.nih.gov/16211473/)
61. Dunne M. Email sent to: Wendy Hovdestad. 9th April 2012.
62. Gender, Alcohol and Culture: An International Study (GENACIS): Sample and Design of all Countries. date unknown [cited 30 June 2014]. Available: [http://www.genacis.org/overviews/overview\\_sampling\\_design.pdf](http://www.genacis.org/overviews/overview_sampling_design.pdf)
63. Gender, Alcohol and Culture: An International Study (GENACIS): Expanded Core Questionnaire. 2001 [cited 30 June 2014]. Available: [http://genacis.org/questionnaires/exp\\_core.pdf](http://genacis.org/questionnaires/exp_core.pdf).
64. King G, Guilbert P, Ward DG, Arwidson P, Noubary F. Correlates of sexual abuse and smoking among French adults. *Child Abuse Negl*. 2006; 30: 709–723. PMID: [16784775](https://pubmed.ncbi.nlm.nih.gov/16784775/)
65. Institut National de Prévention et D'éducation pour la Santé. Baromètre Santé 2000 Questionnaire. date unknown [cited 30 June 2014]. Available: <http://barometre-sante.inpes.fr/document/Enquete1.pdf>.
66. Legleye S, Khlait M, Beck F, Peretti-Watel P. Widening inequalities in smoking initiation and cessation patterns: A cohort and gender analysis in France. *Drug Alcohol Depend*. 2001; 117: 233–241.
67. Institut National de Prévention et d'éducation pour la Santé (date not specified). Baromètre Santé 2005: Attitudes et comportements de santé. date unknown [cited 30 June 2014]. Available: [http://www.inpes.sante.fr/Barometres/BS2005/pdf/BS2005\\_Questionnaire.pdf](http://www.inpes.sante.fr/Barometres/BS2005/pdf/BS2005_Questionnaire.pdf)
68. Léom C. 'Baromètre santé 2010:' Knowledge, Opinions and Behaviour of the French Public with Regards to Alzheimer's Disease. Institut National de Prévention et d'éducation pour la Santé. 2012 [cited 30 June 2014]. Available: <http://www.inpes.sante.fr/deoma/pdf/en/barometre-2010.pdf>
69. King G & Pierre Arwidson. Email sent to: Aimée Campeau. 16th February 2012.
70. National Institute of Public Health. The Danish Health and Morbidity Survey 2000: Self-Administered Questionnaire. date unknown [cited 26 June 2014]. Available: [http://www.si-folkesundhed.dk/upload/self-administrated\\_questionnaires\\_2000\\_with\\_response\\_frequencies.pdf](http://www.si-folkesundhed.dk/upload/self-administrated_questionnaires_2000_with_response_frequencies.pdf).
71. The Dublin Rape Crisis Center (RCC). SAVI and the SAVI revisited. 2005 [cited 30 June 2014]. Available: [http://www.drcc.ie/wp-content/uploads/2011/03/SAVI\\_Revisited.pdf](http://www.drcc.ie/wp-content/uploads/2011/03/SAVI_Revisited.pdf)
72. Royal Collage of Surgeons in Ireland, Health Services Research Center. Sexual abuse and violence in Ireland [survey instrument]. date unknown. Available from authors upon request.
73. Visser RO, Smith A, Rissel CE, Richters J, Grulich AE. Sex in Australia: Experiences of sexual coercion among a representative sample of adults. *Aust N Z J Public Health*. 2003; 27: 198–203. PMID: [14696711](https://pubmed.ncbi.nlm.nih.gov/14696711/)
74. Rissel C. Email sent to: Wendy Hovdestad. 11th September 2013.
75. Richters J. Email sent to: Wendy Hovdestad. 10th February 2014.
76. United States Department of Health and Human Services, Centers for Disease Control and Prevention. Second Injury Control and Risk Survey (ICARIS-2). Centers for Disease Control and Prevention. 2011 [cited 30 June 2014]. Available: <http://www.cdc.gov/Injury/wisqars/pdf/ICARIS2-PublicUse-DataSet-Documentation.pdf>.
77. Kessler RC, Üstün TB, (ed.) The WHO world mental health surveys: Global perspectives on the epidemiology of mental disorders. New York: Cambridge University Press; 2008.
78. Kessler R. NCS-R Interview Schedule and Response Booklet. Harvard Medical School. 2005 [cited 30 June 2014]. Available: <http://www.hcp.med.harvard.edu/ncs/replication.php>
79. Centers for Disease Control and Prevention. 2002 Behavioural Risk Factor Surveillance System Summary Data Quality Report. Centers for Disease Control and Prevention. 2003 [cited 30 June 2014]. Available: [http://www.cdc.gov/brfss/annual\\_data/annual\\_2002.htm](http://www.cdc.gov/brfss/annual_data/annual_2002.htm)

80. Texas Department of State Health Services. Texas 2002 BRFSS Questionnaires. Texas Department of State Health Services. 2004 [cited 30 June 2014]. Available: <http://www.dshs.state.tx.us/chs/brfss/pages/questions.shtm>
81. Centers for Disease Control and Prevention. 2003 Behavioural Risk Factor Surveillance System Summary Data Quality Report. Centers for Disease Control and Prevention. 2004 [cited 30 June 2014]. Available: [http://www.cdc.gov/brfss/annual\\_data/annual\\_2003.htm](http://www.cdc.gov/brfss/annual_data/annual_2003.htm).
82. Centers for Disease Control and Prevention. Behavioral Risk Factor Surveillance System (BRFSS) State-Added Question Database. date unknown [cited 30 June 2014]. Available: [https://www.ark.org/brfss\\_questions/default.aspx](https://www.ark.org/brfss_questions/default.aspx)
83. Centers for Disease Control and Prevention. Behavioural Risk Factor Surveillance System, 2008 Summary Data Quality Report. Centers for Disease Control and Prevention. 2011 [cited 30 June 2014]. Available: [http://www.cdc.gov/brfss/annual\\_data/annual\\_2008.htm](http://www.cdc.gov/brfss/annual_data/annual_2008.htm)
84. Induni M. Email sent to: Aimée Campeau. 21st October 2013 & 25th October 2013.
85. Centers for Disease Control and Prevention. Behavioural Risk Factor Surveillance System, 2009 Summary Data Quality Report. Centers for Disease Control and Prevention. 2011 [cited 30 June 2014]. Available: [http://www.cdc.gov/brfss/annual\\_data/annual\\_2009.htm](http://www.cdc.gov/brfss/annual_data/annual_2009.htm)
86. Centers for Disease Control and Prevention. Behavioural Risk Factor Surveillance System, 2010 Summary Data Quality Report. Centers for Disease Control and Prevention. 2011 [cited 30 June 2014]. Available: [http://www.cdc.gov/brfss/annual\\_data/annual\\_2010.htm](http://www.cdc.gov/brfss/annual_data/annual_2010.htm)
87. Centers for Disease Control and Prevention. BRFSS Pennsylvania 2010: Full questionnaire. Centers for Disease Control and Prevention. date unknown [cited 30 June 2014]. Available: <http://www.portal.state.pa.us/portal/server.pt/directory/state/54562?DirMode=1>
88. Centers for Disease Control and Prevention. Behavioural Risk Factor Surveillance System, 2011 Summary Data Quality Report. Centers for Disease Control and Prevention. 2013 [cited 30 June 2014]. Available: [http://www.cdc.gov/brfss/annual\\_data/annual\\_2011.htm](http://www.cdc.gov/brfss/annual_data/annual_2011.htm)
89. Affi TO, Mather A, Boman J, Fleisher W, Enns MW, MacMillan H, et al. Childhood adversity and personality disorders: Results from a nationally representative population-based study. *J Psychiatr Res*. 2011; 45: 814–822. doi: [10.1016/j.jpsychires.2010.11.008](https://doi.org/10.1016/j.jpsychires.2010.11.008) PMID: [21146190](https://pubmed.ncbi.nlm.nih.gov/21146190/)
90. National Institute on Alcohol Abuse and Alcoholism. National Epidemiological Survey on Alcohol and Related Conditions (NESARC wave 2). Alcohol Use Disorders and Associated Disabilities Interview Schedule—Diagnostic and Statistical Manual of Mental Disorders—fourth revision (AUDADIS-IV). date unknown. Available from authors upon request.
91. Beutel ME, Stobel-Richter Y, Brahler E. Sexual desire and sexual activity of men and women across their lifespans: Results from a representative German community survey. *BJU Int* 101. 2008;76–82. PMID: [17941926](https://pubmed.ncbi.nlm.nih.gov/17941926/)
92. Glaesmer H. Email sent to: Lil Tonmyr. 9th July 2012.
93. Michal M, Wiltink J, Subic-Wrana C, Zwerenz R, Tuin I, Lichy M, et al. Prevalence, correlates, and predictors of depersonalization experiences in the German general population. *J Nerv Ment Dis*. 2009; 197: 499–506. doi: [10.1097/NMD.0b013e3181aacd94](https://doi.org/10.1097/NMD.0b013e3181aacd94) PMID: [19597357](https://pubmed.ncbi.nlm.nih.gov/19597357/)
94. Ross MW, Campbell RL, Clayer JR. New inventory of measures of parental rearing patterns: An English form of the EMBU. *Acta Psychiatr Scand*. 1982; 66: 499–507. PMID: [7180569](https://pubmed.ncbi.nlm.nih.gov/7180569/)
95. Hauffa R, Rief W, Brähler E, Martin A, Mewes R, Glaesmer H. Lifetime traumatic experiences and posttraumatic stress disorder in the German population: Results of a representative population survey. *J Nerv Ment Dis*. 2011; 199: 934. doi: [10.1097/NMD.0b013e3182392c0d](https://doi.org/10.1097/NMD.0b013e3182392c0d) PMID: [22134451](https://pubmed.ncbi.nlm.nih.gov/22134451/)
96. Glaesmer H, Kaiser M, Brähler E, Freyberger HJ, Kuwert P. Posttraumatic stress disorder and its comorbidity with depression and somatisation in the elderly—A German community-based study. *Aging Ment Health*. 2012; 16: 403–412. doi: [10.1080/13607863.2011.615740](https://doi.org/10.1080/13607863.2011.615740) PMID: [22149362](https://pubmed.ncbi.nlm.nih.gov/22149362/)
97. Häuser W, Schmutzer G, Brähler E, Glaesmer H. Maltreatment in childhood and adolescence: Results from a survey of a representative sample of the German population. *Dtsch Arztebl Int*. 2001; 108: 287.
98. Castro-Costa E, Ferri C, Lima-Costa M, Zaleski M, Pinsky I, Caetano R, et al. Alcohol consumption in late-life—The first Brazilian national alcohol survey (BNAS). *Addict Behav*. 2008; 33: 1598–1601. doi: [10.1016/j.addbeh.2008.07.004](https://doi.org/10.1016/j.addbeh.2008.07.004) PMID: [18760540](https://pubmed.ncbi.nlm.nih.gov/18760540/)
99. Madruga CS. Email sent to: Aimée Campeau. 22 October 2011.
100. Instituto Nacional de Ciencia e Tecnologia para Políticas Publicas do Alcool e Outras Drogas. II BNADS: Brazilian National Alcohol and Drug Survey. 2014 [cited 30 June 2014]. Available: <http://inpad.org.br/lenad/in-english/about-the-survey/>
101. Ipsos Public Affairs. Projeto Padroes de Consumo de Alcool II. date unknown [cited 30 June 2014]. Available: [http://inpad.org.br/wp-content/uploads/2013/03/LENAD\\_2012.pdf](http://inpad.org.br/wp-content/uploads/2013/03/LENAD_2012.pdf)

102. Vanwesenbeeck I, Bakker F, Gesell S. Sexual health in the Netherlands: Main results of a population survey among Dutch adults. *Int J Sex Health*. 2010; 22: 55–71.
103. de Haas S, van Berlo W, Bakker F, Vanwesenbeeck I. Prevalence and characteristics of sexual violence in the Netherlands, the risk of revictimization and pregnancy: Results from a national population survey. *Violence Vict*. 2012; 27: 592–608. PMID: [22978077](#)
104. Code Book, Survey: Relaties en Seksualiteit. Amsterdam, The Netherlands. 2008. Available from authors upon request.
105. Bebbington P, Brugha T, Coid J, Crawford M, Deverill C, D'Souza J, et al. Adult Psychiatric Morbidity in England, 2007: Results of a Household Survey. The National Health Services Information Center for Health and Social Care. 2009 [cited 30 June 2014]. Available: <https://catalogue.ic.nhs.uk/publications/mental-health/surveys/adul-psyc-morb-res-hou-sur-eng-2007/adul-psyc-morb-res-hou-sur-eng-2007-rep.pdf>.
106. The National Health Services Information Center for Health and Social Care. APMS 2007: Phase One Questionnaire and Phase Two Contents. The National Health Services Information Center for Health and Social Care. date unknown [cited 30 June 2014]. Available: <http://www.esds.ac.uk/doc/6379/mrdoc/pdf/6379surveydocs.pdf>.
107. Black MC, Basile KC, Breiding MJ, Smith SG, Walters ML, Merrick MT, et al. The National Intimate Partner and Sexual Violence Survey (NISVS): 2010 Summary Report. Atlanta, GA: National Center for Injury Prevention and Control, Centers for Disease Control and Prevention. 2011 [cited 30 June 2014]. Available: [http://www.cdc.gov/ViolencePrevention/pdf/NISVS\\_Report2010-a.pdf](http://www.cdc.gov/ViolencePrevention/pdf/NISVS_Report2010-a.pdf). PMID: [25188037](#)
108. Center for Injury Prevention and Control, Centers for Disease Control and Prevention. National Intimate Partner and Sexual Violence Surveillance System: Draft Study Questionnaire. Office of Information and Regulatory Affairs, Office of Management and Budget. 2009 [cited 30 June 2014]. Available: [http://www.reginfo.gov/public/do/PRAViewIC?ref\\_nbr=200906-0920-020&icID=189766](http://www.reginfo.gov/public/do/PRAViewIC?ref_nbr=200906-0920-020&icID=189766)
109. Centers for Disease Control and Prevention. Prevalence and Characteristics of Sexual Violence, Stalking and Intimate Partner Victimization – National Intimate Partner and Sexual Violence Survey, United States, 2011. 2014 [cited 26 November 2014]. Available: [http://www.cdc.gov/mmwr/preview/mmwrhtml/ss6308a1.htm?s\\_cid=ss6308a1\\_e](http://www.cdc.gov/mmwr/preview/mmwrhtml/ss6308a1.htm?s_cid=ss6308a1_e)
110. Centers for Disease Control and Prevention (2014). National Intimate Partner and Sexual Violence Survey (NISVS) 2011, Victimization Questions. date unknown [cited 26 November 2014]. Available: <http://stacks.cdc.gov/view/cdc/24726>
111. Sunderland A, Findlay LC. Perceived need for mental health care in Canada: Results from the 2012 Canadian Community Health Survey—Mental health. *Statistics Canada Health Reports*. 2013; 24: 3–9.
112. Statistics Canada. Canadian Community Health Survey (CCHS)—Mental Health. Statistics Canada. date unknown [cited 4 December 2014]. Available: <http://www23.statcan.gc.ca/imdb/p2SV.pl?Function=getSurvey&SDDS=5015>
113. Jeon HJ, Lee C, Fava M, Mischoulon D, Shim EJ, Heo JY, et al. Childhood trauma, parental death, and their co-occurrence in relation to current suicidality risk in adults: a nationwide community sample of Korea. *J Nerv Ment Dis*. 2014; 202: 870–876. doi: [10.1097/NMD.0000000000000217](https://doi.org/10.1097/NMD.0000000000000217) PMID: [25370752](#)
114. Korean General Social Survey (KGSS), 2012. date unknown [cited 9 March 2015]; Available: <http://www.icpsr.umich.edu/icpsrweb/ICPSR/studies/35335>
115. Bellis MA, Hughes K, Leckenby N, Perkins C, Lowery H. National household survey of adverse childhood experiences and their relationship with resilience to health-harming behaviors in England. *BMC Med*. 2014; 12: 72. doi: [10.1186/1741-7015-12-72](https://doi.org/10.1186/1741-7015-12-72) PMID: [24886026](#)
116. Scher CD, Stein MB, Asmundson GJ, McCreary DR, Forde DR. The childhood trauma questionnaire in a community sample: Psychometric properties and normative data. *J Trauma Stress*. 2001; 14: 843–857. PMID: [11776429](#)
117. Tanaka M, Wekerle C, Leung E, Waechter R, Gonzalez A, Jamieson E, et al. Preliminary evaluation of the Childhood Experiences of Violence Questionnaire short form. *J Interpers Violence*. 2012; 27: 396–407. doi: [10.1177/0886260511416462](https://doi.org/10.1177/0886260511416462) PMID: [21810788](#)
118. Walsh CA, MacMillan H L, Trocmé N, Jamieson E, Boyle MH. Measurement of victimization in adolescence: Development and validation of the childhood experiences of violence questionnaire. *Child Abuse Negl*. 2008; 32: 1037–1057. doi: [10.1016/j.chiabu.2008.05.003](https://doi.org/10.1016/j.chiabu.2008.05.003) PMID: [18992940](#)
119. Straus MA. Measuring intrafamily conflict and violence: The Conflict Tactics (CT) Scales. *J Marriage Fam*. 1979: 75–88.



120. Straus MA, Hamby SL, Finkelhor D, Moore DW, Runyan D. Identification of child maltreatment with the Parent-Child Conflict Tactics Scales: Development and psychometric data for a national sample of American parents. *Child Abuse Negl.* 1998; 22: 249–270. PMID: [9589178](#)
121. Felitti VJ, Anda RF, Nordenberg D, Williamson DF, Spitz AM, Edwards V, et al. Relationship of childhood abuse and household dysfunction to many of the leading causes of death in adults: The Adverse Childhood Experiences (ACE) study. *Am J Prev Med.* 1998; 14: 245–258. PMID: [9635069](#)
122. Kessler RC, Sonnega A, Bromet E, Hughes M, Nelson CB. Posttraumatic stress disorder in the National Comorbidity Survey. *Arch Gen Psychiatry.* 1995; 52: 1048. PMID: [7492257](#)
123. Shonkoff JP, Garner AS, Siegel BS, Dobbins MI, Earls MF, McGuinn L, et al. The lifelong effects of early childhood adversity and toxic stress. *Pediatrics.* 2012; 129: e232–e246. doi: [10.1542/peds.2011-2663](#) PMID: [22201156](#)
124. MacMillan HL. Preventive health care, 2000 update: Prevention of child maltreatment. *Can Med Assoc J.* 2000; 163: 1451–1458.
125. Bebbington PE, Jonas S, Brugha T, Meltzer H, Jenkins R, Cooper C, et al. Child sexual abuse reported by an English national sample: Characteristics and demography. *Soc Psychiatry Psychiatr Epidemiol.* 2011; 46: 255–262. doi: [10.1007/s00127-010-0245-8](#) PMID: [20544176](#)
126. Bethlehem J. Selection bias in web surveys. *Int Stat Rev.* 2010; 78: 161–188.
127. Prescott A, Bank L, Reid JB, Knutson JF, Burraston BO, Eddy JM. The veridicality of punitive childhood experiences reported by adolescents and young adults. *Child Abuse Negl.* 2000; 24: 411–423. PMID: [10739084](#)
128. Kessler RC, Avenevoli S, Green J, Gruber MJ, Guyer M, He Y, et al. National Comorbidity Survey Adolescent Supplement (NCS-A): III. Concordance of DSM-IV/CIDI diagnoses with clinical reassessments. *J Am Acad Child Psy.* 2009; 48: 386–399. doi: [10.1097/CHI.0b013e31819a1cbc](#) PMID: [19252450](#)
129. Kessler RC, Davis CG, Kendler KS. Childhood adversity and adult psychiatric disorder in the US National Comorbidity Survey. *Psychol Med.* 1997; 27: 1101–1119. PMID: [9300515](#)
130. Finkelhor D, Ormrod RK, Turner HA. Poly-victimization: A neglected component in child victimization. *Child Abuse Negl.* 2007; 3: 7–26.
131. Briere J. Methodological issues in the study of sexual abuse effects. *J Consult Clin Psychol.* 1992; 60: 196–203. PMID: [1592948](#)
132. Maniglio R. The impact of child sexual abuse on health: A systematic review of reviews. *Clin Psychol Rev.* 2009; 29: 647. doi: [10.1016/j.cpr.2009.08.003](#) PMID: [19733950](#)
133. Wegman HL, Stetler C. A meta-analytic review of the effects of childhood abuse on medical outcomes in adulthood. *Psychosom Med.* 2009; 71: 805–812. doi: [10.1097/PSY.0b013e3181bb2b46](#) PMID: [19779142](#)
134. Feiring C, Zielinski M. Looking back and looking forward: A review and reflection on research articles published in *Child Maltreatment* from 1996 through 2010. *Child Maltreat.* 2011; 16: 3–8. doi: [10.1177/1077559510386708](#) PMID: [21212074](#)
135. Stoltenborgh M, Bakermans-Kranenburg MJ, van IJzendoorn MH. The neglect of child neglect: A meta-analytic review of the prevalence of neglect. *Soc Psychiatry Psychiatr Epidemiol.* 2013; 48: 345–355. doi: [10.1007/s00127-012-0549-y](#) PMID: [22797133](#)
136. Finkelhor D, Ormrod R, Turner H, Hamby SL. The victimization of children and youth: A comprehensive, national survey. *Child Maltreat.* 2005; 10: 5–25. PMID: [15611323](#)
137. Fuller-Thomson E, Brennenstuhl S, Frank J. The association between childhood physical abuse and heart disease in adulthood: Findings from a representative community sample. *Child Abuse Negl.* 2010; 34: 689–698. doi: [10.1016/j.chiabu.2010.02.005](#) PMID: [20663556](#)
138. Subramanian SV, Ackerson LK, Subramanyam MA, Wright RJ. Domestic violence is associated with adult and childhood asthma prevalence in India. *Int J Epidemiol.* 2007; 36: 569–579. PMID: [17329314](#)
139. Sadowski LS, Hunter WM, Bangdiwala SI, Muñoz SR. The World Studies of Abuse in the Family Environment (WorldSAFE): A model of a multi-national study of family violence. *Injury Control Safe Promot.* 2004; 11: 81–90. PMID: [15370344](#)
140. Singh A, Mahapatra B, Dutta S. Spousal abuse and infant and child mortality in India. *Asia Pac Pop.* 2008; 23: 33–54.
141. Gilbert R, Kemp A, Thoburn J, Sidebotham P, Radford L, Glaser D et al. Recognising and Responding to child maltreatment. *Lancet.* 2009; 373: 167–180. doi: [10.1016/S0140-6736\(08\)61707-9](#) PMID: [19056119](#)

142. Tausig M, Subedi J, Broughton C, Pokimica J, Huang Y, Santangelo SL. The continued salience of methodological issues for measuring psychiatric disorders in international surveys. *Int J Ment Health Addiction*. 2011; 9: 229–239.
143. Thompson A, Xiajie C. Increasing childhood trauma in Canada: Findings from the National Population Health Survey, 1994/95. *Can J Public Health*. 2000; 91: 197–200. PMID: [10927848](#)
144. Lauterbach D, Koch EI, Porter K. The relationship between childhood support and later emergence of PTSD. *J Trauma Stress*. 2007; 20: 857–867. PMID: [17955546](#)
145. Briere J, Rickards S. Self-awareness, affect regulation, and relatedness: Differential sequels of childhood versus adult victimization experiences. *J Nerv Ment Dis*. 2007; 195: 497–503. PMID: [17568298](#)
146. Topitzes J, Mersky JP, Reynolds AJ. Child maltreatment and adult cigarette smoking: A long-term developmental model. *J Pediatr Psychol*. 2010; 35: 484–498. doi: [10.1093/jpepsy/jsp119](#) PMID: [19995869](#)
147. Irish L, Kobayashi I, Delahanty DL. Long-term physical health consequences of childhood sexual abuse: A meta-analytic review. *J Pediatr Psychol*. 2010; 35: 450–461. doi: [10.1093/jpepsy/jsp118](#) PMID: [20022919](#)
